# Supplementary material
Source: HighWire-hosted journal article supplement (https://bmjmedicine.bmj.com/highwire/filestream/381/field_highwire_adjunct_files/0/bmjmed-2021-000098supp001_data_supplement.pdf)
Supplement: bmjmed-2021-000098supp001_data_supplement.pdf [file bmjmed-2021-000098supp001_data_supplement.pdf]

## Supplemental material

### Assessment of modifiable risk factors

*BMI.* Body weight and height were asked in biennial questionnaires from 1984 to 2016 in the NHS and from 1986 to 2016 in the HPFS, and BMI was calculated as weight (kg) over height (m) squared. The correlation between measured and self-reported weight was 0.97 for both NHS and HPFS participants.<sup>1</sup> We have 17 and 16 repeated measures of BMI in the NHS and HPFS, respectively.

*Smoking.* Participants self-reported their smoking status (past, current, never smoker) and the number of cigarettes smoked (1-4, 5-14, 15-24, 25-34, 35-44, and  $\geq 45$  cigarettes/day) in biennial questionnaires from 1984 to 2016 in the NHS and from 1986 to 2016 in the HPFS. We categorized smoking status into 13 groups, namely never, former (categorized into 1-4, 5-14, 15-24, 25-34, 35-44,  $\geq 45$  cigarettes/day), current (categorized in to 1-4, 5-14, 15-24, 25-34, 35-44,  $\geq 45$  cigarettes/day), and assigned numbers 0-12 for the 13 groups. We have 17 and 16 repeated measures of smoking in the NHS and HPFS, respectively.

*Alcohol intake.* In 1984, a 116-item food frequency questionnaire (FFQ) was administered to the NHS participants to obtain information on usual intake of food and beverages. Starting in 1986, an expanded 131-item FFQ was administered every 4 years to update diet from the NHS and the HPFS participants. In FFQs, participants were asked how often (from “never or less than once per month” to “6 or more times per day”) on average they consumed a standard portion size of each food item during the previous year. The FFQ has shown good validity and reproducibility, and the results have been described in detail elsewhere.<sup>2-5</sup> Questions about the consumption of alcoholic

beverages (including beer, wine, and liquor) were included in each questionnaire. Alcohol intake was assessed until 2010 in the NHS and 2014 in the HPFS, and we have 8 repeated measures in both cohorts.

*Diet quality: The Alternative Health Eating Index (AHEI).* In each 4-year cycle of diet assessment via an extensively validated food frequency questionnaire, food items were combined into food groups, and a dietary pattern score AHEI-2010 was derived to reflect diet quality.<sup>6</sup> In our analysis, scoring for the AHEI-2010 was based on intake levels of 10 components, excluding alcohol, which were chosen on the basis of their association with chronic disease and mortality risk in observational and interventional studies.<sup>6</sup> The score emphasized higher intakes of fruit, vegetables, whole grains, long-chain omega-3 fats, nuts and legumes, and polyunsaturated fatty acids and lower intakes of sugar-sweetened beverages, red and processed meat, *trans* fat, and sodium. Each component was scored from 0 (unhealthy) to 10 (healthiest), and the total score ranged from 0 (non-adherence) to 100 (perfect adherence). We have 8 and 6 repeated measures of diet in the NHS and HPFS, respectively.

*Physical activity.* Physical activity was assessed by previously validated questionnaires.<sup>7</sup> Beginning in 1986 participants from both cohorts self-reported amount of time spent per week on each of the following physical activities: walking; jogging; running; bicycling; calisthenics, aerobics, aerobic dance, or rowing machine use; lap swimming; playing tennis; and playing squash or racquet ball. From this information, weekly energy expenditure in metabolic equivalent task-hours (MET-hours) was calculated.<sup>8</sup> The reproducibility and validity of the physical activity questionnaire has been described elsewhere.<sup>7</sup> The correlation for physical activity between two

repeated questionnaires administered two years apart was 0.59, and correlation between physical activity reported in diaries and that reported on questionnaire was 0.62. Physical activity was assessed 11 times in the NHS, and 7 times in the HPFS.

### Smoothing mixture model (SMM)

We used SMM to identify patterns of each risk factor, which adopted a modified expectation-maximization (EM) algorithm to delineate trajectories with smoothing functions of age.<sup>9</sup>

Initially, we divided participants into  $k$  groups according to the mean value of a risk factor across follow-up period. The group assignment and estimation of the smooth trajectories for each group were achieved by iterating the expectation step (E step) and maximization step (M step).

In M step, for individual  $i$  that was classified into the group  $m$ , the model was  $E(Y_i) =$

$f_m(t_i) + b_{mi}$ , where the vector  $Y_i$  was the multiple repeated measurements of the risk factor over time  $t_i$  for individual  $i$ ,  $f_m(\cdot)$  was a non-parametric penalized smoothing function of age, and  $b_{mi}$  was random effect of individual  $i$ . Then we obtained mean predicted value

$\hat{Y}_{i(1)}, \hat{Y}_{i(2)}, \dots, \hat{Y}_{i(k)}$  estimated from the model fitted in the 1st, 2nd, ...,  $k$ th groups, respectively.

In the E step, we obtained the log likelihood contributions of individual  $i$ 's trajectory of responses belonging to the 1st, 2nd, ...,  $k$ th groups, and reassigned individual  $i$  to the group with the largest log likelihood. The E and M steps were iterated until the model converged, which was determined when the sum of the largest log likelihood for all individuals remained the same. The R script of the SMM is available in Github (<https://github.com/mingding-hsph/Smoothing-mixture-model>).

**Total, between-person, and within-person sum of squares**

Total sum of squares: We first calculated the difference between each value and the grand mean, which was the mean of all values from all participants. Then we summed the squared differences across all participants.

Between-person sum of squares: For each participant, we first computed the difference between its group mean and the grand mean. Then we summed the squared differences across all participants.

Within-person sum of squares: For each participant, we first computed the difference between each value and its group mean. Then we summed the squared differences across all participants.

Total sum of squares would be equal to the sum of between-person sum of squares and within-person sum of squares.

**Joint membership of trajectories of risk factors and trajectories of change in risk factors**

First, we identified trajectories of risk factors during follow-up and classified participants into three groups (high, medium, low) using SMM. Within each group, we obtained the mean predicted value of risk factor with age (fixed effects) and the predicted value of risk factor with age for each participant (random effects) from the output of SMM. We plotted the mean and 95% CI of predicted trajectories of each group and predicted trajectories of individuals within each group using the ‘ggplot’ command in R 3.5.0. The identification of trajectories of risk factors was conducted in the NHS and the HPFS, separately.

Second, we reclassified these participants using SMM from a different dimension—trajectories of change in risk factors from baseline. The participants were classified into three groups: increase, stable, and decrease. Within each group, we obtained the mean predicted value

of change in risk factor (fixed effects) and the predicted value of change in risk factor for each participant (random effects) from the output of SMM. We plotted the mean and 95% CI of predicted trajectories of each group and predicted trajectories of individuals within each group using the ‘ggplot’ command in R 3.5.0. The identification of trajectories of risk factors was conducted in the NHS and the HPFS, separately.

Finally, based on the group memberships of trajectories of risk factors and trajectories of change in risk factors, we jointly classified participants into nine groups: high–stable, high–increase, high–decrease, medium–stable, medium–increase, medium–decrease, low–stable, low–increase, and low–decrease. After obtaining the joint group membership, we pooled the data of the NHS and the HPFS. Within each joint group, we calculated mean value of risk factor with age and used ‘loess.smooth’ function in R to obtain the trajectories of risk factors with age. The trajectories of risk factors based on joint group memberships were plotted using ‘plot’ command in R 3.5.0.

### **Group-based trajectory analysis**

Proposed by Nagin *et al*, group-based trajectory analysis is a widely used method to classify participants within a population with heterogeneous longitudinal trajectories.<sup>10</sup> It allows different sets of parameter values for mixture components corresponding to different unobserved subgroups of individuals, and captures latent trajectory classes with different growth curves by using an expectation-maximization (EM) algorithm. Group-based trajectory analysis assumes individuals within groups are homogenous and uses polynomials to generate flexible trajectories.<sup>11</sup> We modeled trajectories with cubic polynomials, fitted group-based trajectory model using “proc traj” command using SAS version 9.2 for UNIX (SAS Institute, Cary, NC), and plotted the trajectories using “trajplot” command.<sup>12</sup>

**Table S1. Time (year) at assessment of modifiable risk factors in the Nurses' Health Study (NHS) and the Health Professionals Follow-up Study (HPFS).**

|                   | Time at assessment of risk factors |    |    |    |    |    |    |    |    |    |    |    |    |    |    |    |    |
|-------------------|------------------------------------|----|----|----|----|----|----|----|----|----|----|----|----|----|----|----|----|
|                   | 84                                 | 86 | 88 | 90 | 92 | 94 | 96 | 98 | 00 | 02 | 04 | 06 | 08 | 10 | 12 | 14 | 16 |
| BMI, smoking      |                                    |    |    |    |    |    |    |    |    |    |    |    |    |    |    |    |    |
| NHS               | X                                  | X  | X  | X  | X  | X  | X  | X  | X  | X  | X  | X  | X  | X  | X  | X  | X  |
| HPFS              |                                    | X  | X  | X  | X  | X  | X  | X  | X  | X  | X  | X  | X  | X  | X  | X  | X  |
| Diet quality      |                                    |    |    |    |    |    |    |    |    |    |    |    |    |    |    |    |    |
| NHS               | X                                  | X  |    | X  |    | X  |    | X  |    | X  |    | X  |    | X  |    |    |    |
| HPFS              |                                    | X  |    | X  |    | X  |    | X  |    | X  |    | X  |    |    |    |    |    |
| Physical activity |                                    |    |    |    |    |    |    |    |    |    |    |    |    |    |    |    |    |
| NHS               |                                    | X  | X  |    | X  | X  | X  | X  | X  |    | X  |    | X  |    | X  | X  |    |
| HPFS              |                                    | X  |    | X  |    | X  |    | X  |    | X  |    | X  | X  |    |    |    |    |
| Alcohol intake    |                                    |    |    |    |    |    |    |    |    |    |    |    |    |    |    |    |    |
| NHS               | X                                  | X  |    | X  |    | X  |    | X  |    | X  |    | X  |    | X  |    | X  |    |
| HPFS              |                                    | X  |    | X  |    | X  |    | X  |    | X  |    | X  |    | X  |    |    |    |

**Table S2. Variance components of body mass index (BMI), smoking, alcohol intake, diet quality, and physical activity in the Nurses' Health Study and the Health Professionals Follow-up Study.**

|                   | NHS                                |                  |          |                                                  | HPFS                               |                  |          |                                                  |
|-------------------|------------------------------------|------------------|----------|--------------------------------------------------|------------------------------------|------------------|----------|--------------------------------------------------|
| Risk factors      | Between person sum of squares (SS) | Within person SS | Total SS | Proportion of between person SS over total SS, % | Between person sum of squares (SS) | Within person SS | Total SS | Proportion of between person SS over total SS, % |
| BMI               | 10650346                           | 1533622          | 12183968 | 87                                               | 2381276                            | 275831           | 2657107  | 90                                               |
| Smoking           | 22907934                           | 9006215          | 31914149 | 72                                               | 6508684                            | 2263251          | 8771935  | 74                                               |
| Alcohol intake    | 8218491                            | 2793784          | 11012275 | 75                                               | 9266668                            | 2681234          | 11947902 | 78                                               |
| AHEI              | 15671920                           | 9071161          | 24743080 | 63                                               | 8416905                            | 2650293          | 11067198 | 76                                               |
| Physical activity | 27163279                           | 28920211         | 56083489 | 48                                               | 26252022                           | 18104344         | 44356366 | 59                                               |

**Figure S1. A flow diagram of sample selection in the Nurses' Health Study (NHS).**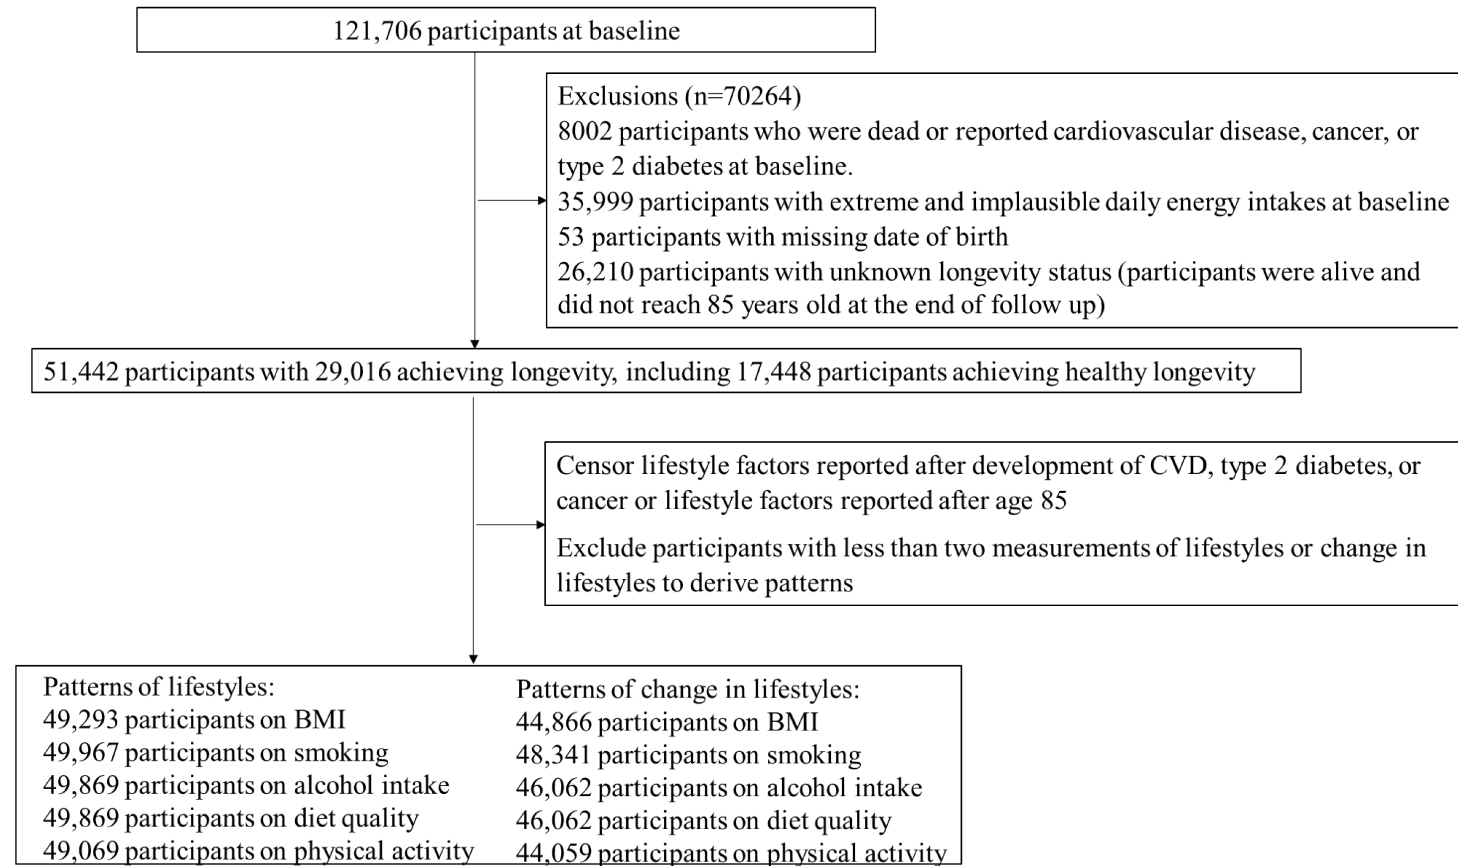



**Figure S2. A flow diagram of sample selection in the Health Professionals Follow-up Study (HPFS).**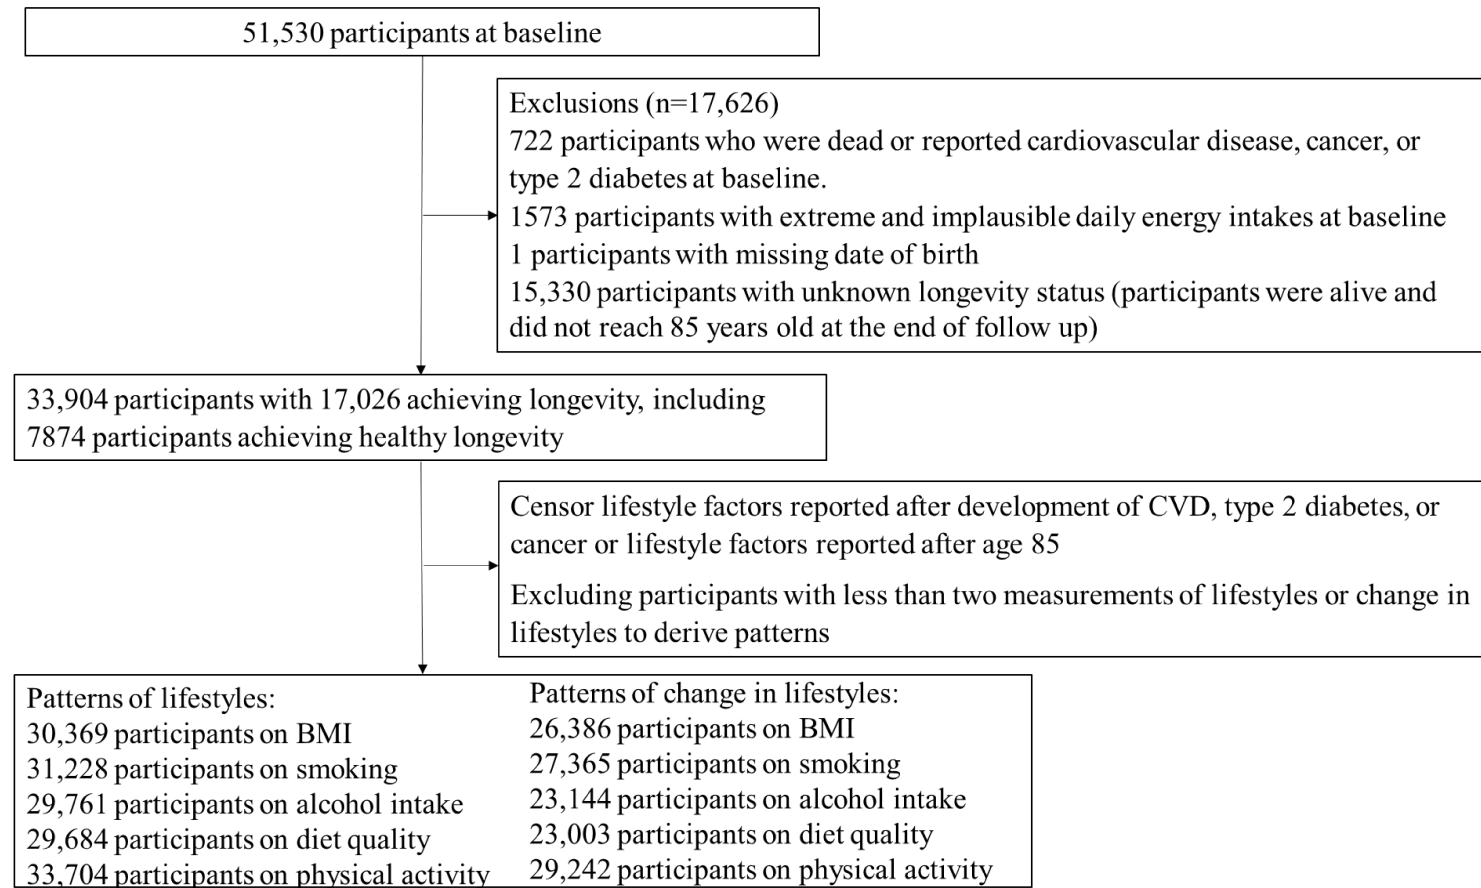

**Table S3. Baseline characteristics of participants by trajectories of modifiable risk factors including body mass index (BMI), smoking, alcohol intake, diet quality, and physical activity in the Nurses' Health Study (NHS, women) and the Health Professionals Follow-up Study (HPFS, men).**

|                                             | BMI               |                     |                     |                  | Smoking           |                    |                    |                  |         |
|---------------------------------------------|-------------------|---------------------|---------------------|------------------|-------------------|--------------------|--------------------|------------------|---------|
|                                             | NHS (1984)        | Low<br>(n=23,856)   | Medium<br>(n=19658) | High<br>(n=5810) | P value           | Low<br>(n=39,773)  | Medium<br>(n=6739) | High<br>(n=3487) | P value |
| Age                                         |                   | 54.79<br>(5.18)     | 54.08<br>(5.34)     | 52.15<br>(5.88)  | <0.001            | 54.36<br>(5.29)    | 53.11<br>(5.78)    | 54.50<br>(5.66)  | <0.001  |
| BMI (kg/m <sup>2</sup> )                    |                   | 21.96<br>(1.95)     | 26.44<br>(2.61)     | 34.06<br>(4.73)  | <0.001            | 25.43<br>(4.76)    | 24.09<br>(4.13)    | 24.47<br>(4.38)  | <0.001  |
| Alcohol intake (g)                          |                   | 8.73<br>(12.71)     | 6.706<br>(11.348)   | 4.09<br>(9.078)  | <0.001            | 6.49<br>(10.68)    | 9.814<br>(13.879)  | 13.08<br>(17.94) | <0.001  |
| Physical activity (MET-h/week)              |                   | 15.79<br>(21.82)    | 44.36<br>(10.09)    | 10.15<br>(15.55) | <0.001            | 14.66<br>(20.42)   | 42.13<br>(9.71)    | 9.91<br>(20.78)  | <0.001  |
| AHEI                                        |                   | 44.33<br>(10.52)    | 13.06<br>(19.63)    | 43.53<br>(10.1)  | <0.001            | 44.94<br>(10.36)   | 12.29<br>(19.71)   | 40.49<br>(9.37)  | <0.001  |
| Current smoker, %                           |                   | 29                  | 24                  | 20               | <0.001            | 8                  | 97                 | 99               | <0.001  |
| Caucasian, %                                |                   | 98                  | 98                  | 97               | <0.001            | 98                 | 98                 | 99               | <0.001  |
| Menopausal status, %                        |                   | 70                  | 69                  | 68               | <0.001            | 68                 | 74                 | 75               | <0.001  |
| Postmenopausal hormone use, % <sup>§</sup>  |                   | 21                  | 17                  | 11               | <0.001            | 19                 | 16                 | 14               | <0.001  |
| Family history of cancer, %                 |                   | 43                  | 43                  | 42               | 0.78              | 43                 | 40                 | 39               | 0.43    |
| Family history of cardiovascular disease, % |                   | 35                  | 36                  | 37               | 0.004             | 36                 | 36                 | 37               | <0.001  |
| Family history of diabetes, %               |                   | 20                  | 25                  | 30               | <0.001            | 23                 | 21                 | 20               | <0.001  |
| Multivitamin use, %                         |                   | 40                  | 38                  | 35               | <0.001            | 39                 | 34                 | 34               | <0.001  |
| HPFS (1986)                                 | Low<br>(n=14,213) | Medium<br>(n=13213) | High<br>(n=2947)    |                  | Low<br>(n=28,242) | Medium<br>(n=2086) | High<br>(n=904)    |                  |         |
| Age                                         |                   | 60.59<br>(7.67)     | 58.74<br>(7.73)     | 55.05<br>(7.91)  | <0.001            | 59.40<br>(7.87)    | 57.67<br>(8.01)    | 60.11<br>(8.48)  | <0.001  |
| BMI (kg/m <sup>2</sup> )                    |                   | 22.83<br>(3.52)     | 26.2<br>(4.16)      | 31.34<br>(6.77)  | <0.001            | 25.03<br>(5.10)    | 24.61<br>(5.59)    | 24.42<br>(5.81)  | <0.001  |
| Alcohol intake (g)                          |                   | 11.98<br>(15.76)    | 12.48<br>(16.71)    | 10.7<br>(16.17)  | 0.42              | 11.37<br>(15.48)   | 17.16<br>(19.6)    | 22.1<br>(24.69)  | <0.001  |

|                                             |                  |                  |                  |        |                  |                  |                  |        |
|---------------------------------------------|------------------|------------------|------------------|--------|------------------|------------------|------------------|--------|
| Physical activity (MET-h/week)              | 22.59<br>(28.17) | 47.12<br>(10.61) | 12.82<br>(20.19) | <0.001 | 20.28<br>(27.16) | 43.62<br>(10.49) | 11.15<br>(17.50) | <0.001 |
| AHEI                                        | 48.56<br>(11.10) | 18.41<br>(26.45) | 46.24<br>(10.58) | <0.001 | 48.26<br>(10.83) | 15.45<br>(21.25) | 41.39<br>(9.90)  | <0.001 |
| Current smoker, %                           | 11               | 10               | 10               | 0.20   | 3                | 82               | 98               | <0.001 |
| Caucasian, %                                | 91               | 91               | 91               | 0.01   | 91               | 90               | 93               | 0.58   |
| Family history of cancer, %                 | 9                | 9                | 11               | 0.06   | 9                | 10               | 9                | 0.87   |
| Family history of cardiovascular disease, % | 35               | 35               | 35               | 0.50   | 35               | 33               | 34               | 0.04   |
| Family history of diabetes, %               | 15               | 16               | 16               | 0.004  | 15               | 13               | 12               | <0.001 |
| Multivitamin use, %                         | 37               | 33               | 30               | <0.001 | 35               | 27               | 35               | <0.001 |

-continued

| NHS (1984)                                 | AHEI              |                     |                    |         | Physical activity |                     |               |         |
|--------------------------------------------|-------------------|---------------------|--------------------|---------|-------------------|---------------------|---------------|---------|
|                                            | Low<br>(n=16,152) | Medium<br>(n=22395) | High<br>(n=11,355) | P value | Low<br>(n=32,110) | Medium<br>(n=14251) | High (n=2739) | P value |
| Age                                        | 53.47<br>(5.64)   | 54.33<br>(5.28)     | 55.04<br>(5.06)    | <0.001  | 54.29<br>(5.43)   | 54.17<br>(5.24)     | 53.41 (5.41)  | <0.001  |
| BMI (kg/m <sup>2</sup> )                   | 25.50<br>(5.00)   | 25.27<br>(4.64)     | 24.66<br>(4.32)    | <0.001  | 25.66<br>(4.92)   | 24.33<br>(3.94)     | 23.67 (3.83)  | <0.001  |
| Alcohol intake (g)                         | 7.87<br>(13.07)   | 7.447<br>(11.73)    | 6.57<br>(10.31)    | <0.001  | 7.24<br>(12.18)   | 7.601<br>(11.291)   | 8.04 (11.70)  | <0.001  |
| Physical activity (MET-h/week)             | 9.98<br>(14.23)   | 44.83<br>(6.67)     | 19.62<br>(26.38)   | <0.001  | 7.35<br>(8.62)    | 46.2<br>(10.38)     | 51.81 (51.80) | <0.001  |
| AHEI                                       | 35.19<br>(6.31)   | 14.08<br>(20.04)    | 55.96<br>(8.06)    | <0.001  | 43.03<br>(10.01)  | 21.72<br>(18.25)    | 48.82 (10.81) | <0.001  |
| Current smoker, %                          | 33                | 25                  | 17                 | <0.001  | 28                | 22                  | 21            | <0.001  |
| Caucasian, %                               | 99                | 98                  | 97                 | <0.001  | 98                | 98                  | 98            | 0.03    |
| Menopausal status, %                       | 70                | 70                  | 69                 | <0.001  | 70                | 69                  | 70            | 0.09    |
| Postmenopausal hormone use, % <sup>§</sup> | 16                | 19                  | 21                 | <0.001  | 18                | 19                  | 19            | <0.001  |
| Family history of cancer, %                | 43                | 43                  | 43                 | 0.24    | 43                | 44                  | 43            | 0.02    |

|                                             |                         |                             |                          |        |                           |                            |                      |        |
|---------------------------------------------|-------------------------|-----------------------------|--------------------------|--------|---------------------------|----------------------------|----------------------|--------|
| Family history of cardiovascular disease, % | 36                      | 36                          | 36                       | 0.26   | 36                        | 35                         | 36                   | 0.52   |
| Family history of diabetes, %               | 24                      | 23                          | 23                       | 0.23   | 23                        | 23                         | 21                   | 0.12   |
| Multivitamin use, %                         | 34                      | 40                          | 45                       | <0.001 | 37                        | 42                         | 44                   | <0.001 |
| <b>HPFS (1986)</b>                          | <b>Low<br/>(n=8978)</b> | <b>Medium<br/>(n=13082)</b> | <b>High<br/>(n=7628)</b> |        | <b>Low<br/>(n=22,244)</b> | <b>Medium<br/>(n=9625)</b> | <b>High (n=1839)</b> |        |
| Age                                         | 58.20<br>(7.88)         | 59.47<br>(7.69)             | 60.61<br>(7.62)          | <0.001 | 60.01<br>(8.05)           | 58.75<br>(7.76)            | 57.84 (7.63)         | <0.001 |
| BMI (kg/m <sup>2</sup> )                    | 25.41<br>(5.17)         | 25.06 (5)                   | 24.46<br>(4.90)          | <0.001 | 25.23<br>(5.54)           | 24.62<br>(4.7)             | 24.38 (4.37)         | <0.001 |
| Alcohol intake (g)                          | 14.23<br>(18.55)        | 12.07<br>(15.64)            | 9.60<br>(13.42)          | <0.001 | 11.83<br>(16.55)          | 12.47<br>(15.89)           | 12.35 (15.83)        | 0.003  |
| Physical activity (MET-h/week)              | 15.5<br>(22.85)         | 48.31<br>(6.24)             | 25.59<br>(29.67)         | <0.001 | 9.60<br>(10.20)           | 49.49<br>(10.75)           | 73.03 (65.82)        | <0.001 |
| AHEI                                        | 36.84<br>(6.41)         | 19.54<br>(26.73)            | 59.96<br>(7.43)          | <0.001 | 46.77<br>(10.83)          | 32.45<br>(22.39)           | 50.68 (11.22)        | <0.001 |
| Current smoker, %                           | 16                      | 9                           | 4                        | <0.001 | 13                        | 8                          | 7                    | <0.001 |
| Caucasian, %                                | 92                      | 91                          | 91                       | <0.001 | 91                        | 91                         | 91                   | 0.06   |
| Family history of cancer, %                 | 9                       | 9                           | 10                       | 0.01   | 9                         | 9                          | 9                    | 1.00   |
| Family history of cardiovascular disease, % | 33                      | 35                          | 39                       | <0.001 | 36                        | 34                         | 35                   | 0.04   |
| Family history of diabetes, %               | 15                      | 16                          | 16                       | 0.01   | 15                        | 15                         | 15                   | 0.56   |
| Multivitamin use, %                         | 32                      | 35                          | 40                       | <0.001 | 32                        | 35                         | 36                   | <0.001 |

-continued

| Alcohol intake                              |                   |                         |                  |         |
|---------------------------------------------|-------------------|-------------------------|------------------|---------|
| NHS (1984)                                  | Low<br>(n=36,728) | Medium<br>(n=10025<br>) | High<br>(n=3149) | P value |
| Age                                         | 54.23<br>(5.41)   | 54.2<br>(5.29)          | 54.02<br>(5.32)  | <0.001  |
| BMI (kg/m <sup>2</sup> )                    | 25.69<br>(4.96)   | 23.91<br>(3.54)         | 23.81<br>(3.70)  | <0.001  |
| Alcohol intake (g)                          | 2.46<br>(3.84)    | 16.27<br>(10.82)        | 36.39<br>(17.98) | <0.001  |
| Physical activity (MET-h/week)              | 13.28<br>(19.50)  | 44.63<br>(10.01)        | 14.42<br>(19.91) | <0.001  |
| AHEI                                        | 44.27<br>(10.45)  | 16.52<br>(23.68)        | 42.76<br>(9.74)  | <0.001  |
| Current smoker, %                           | 23                | 32                      | 45               | <0.001  |
| Caucasian, %                                | 97                | 99                      | 99               | <0.001  |
| Menopausal status, %                        | 69                | 70                      | 71               | 0.15    |
| Postmenopausal hormone use, % <sup>§</sup>  | 18                | 20                      | 19               | <0.001  |
| Family history of cancer, %                 | 43                | 43                      | 42               | 0.28    |
| Family history of cardiovascular disease, % | 36                | 36                      | 36               | 0.60    |
| Family history of diabetes, %               | 25                | 20                      | 17               | <0.001  |
| Multivitamin use, %                         | 39                | 40                      | 38               | 0.72    |
| HPFS (1986)                                 | Low<br>(n=18,786) | Medium<br>(n=8050)      | High<br>(n=2929) |         |
| Age                                         | 59.54<br>(7.88)   | 58.94<br>(7.55)         | 59.4<br>(7.79)   | <0.001  |
| BMI (kg/m <sup>2</sup> )                    | 25.08<br>(5.18)   | 24.86<br>(4.69)         | 25.03<br>(5.03)  | 0.05    |
| Alcohol intake (g)                          | 3.65<br>(4.72)    | 19.37<br>(11.24)        | 46.14<br>(19.99) | <0.001  |

|                                             |                  |                  |                  |        |
|---------------------------------------------|------------------|------------------|------------------|--------|
| Physical activity (MET-h/week)              | 48.31<br>(11.05) | 47.98<br>(10.56) | 44.46<br>(10.37) | <0.001 |
| AHEI                                        | 18.94<br>(26.18) | 21.83<br>(27.33) | 19.48<br>(27.07) | <0.001 |
| Current smoker, %                           | 8                | 11               | 21               | <0.001 |
| Caucasian, %                                | 91               | 92               | 93               | <0.001 |
| Family history of cancer, %                 | 10               | 9                | 10               | 0.54   |
| Family history of cardiovascular disease, % | 35               | 35               | 37               | 0.30   |
| Family history of diabetes, %               | 17               | 14               | 15               | <0.001 |
| Multivitamin use, %                         | 35               | 35               | 37               | 0.21   |

MET-h/week: metabolic equivalent hours per week; AHEI: Alternate healthy eating index

For continuous variables, data are mean values and standard deviations.

§Percentage of current postmenopausal hormone use among total women.

P values were obtained using linear regression for continuous variables and logistic regression for categorical variables.

**Figure S3. Plots of patterns of modifiable risk factors with 95% confidence interval in the Nurses' Health Study.**

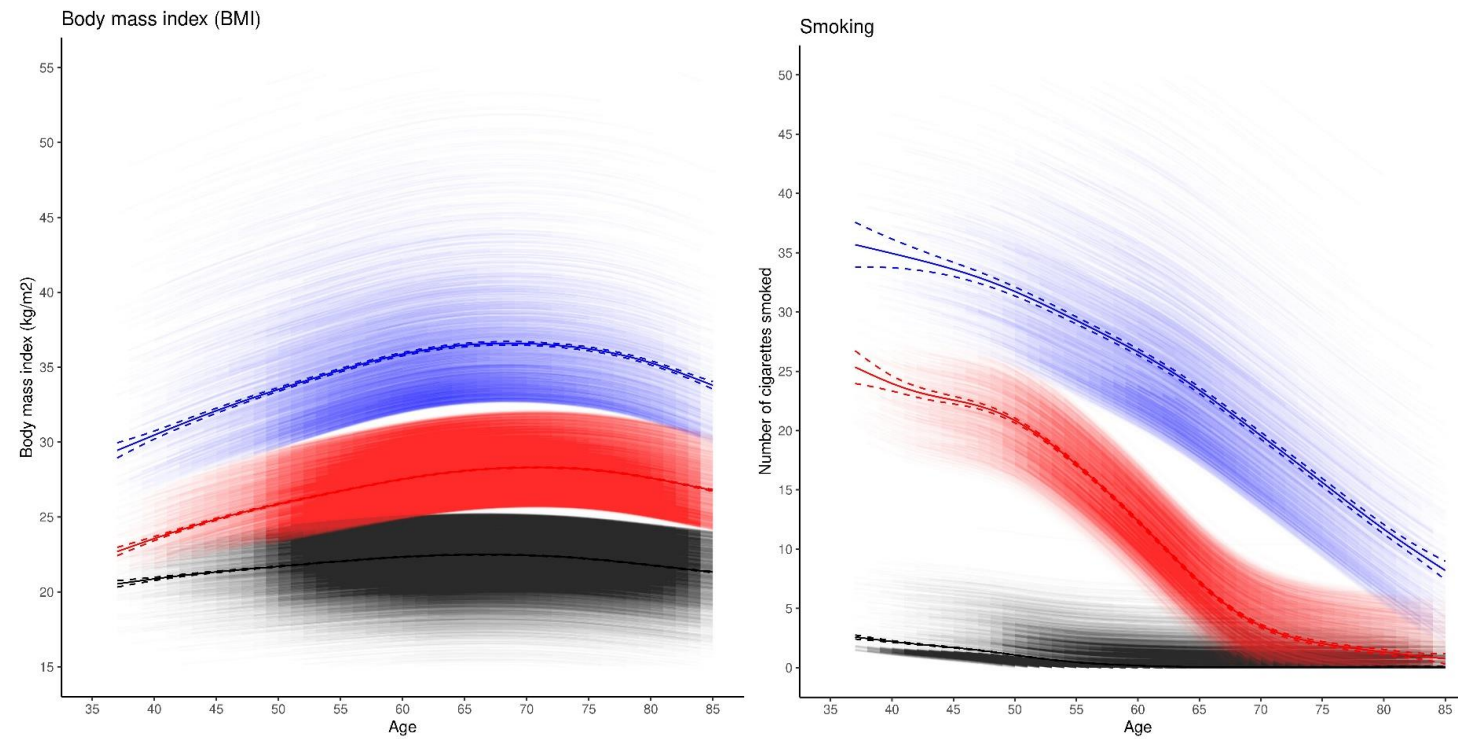

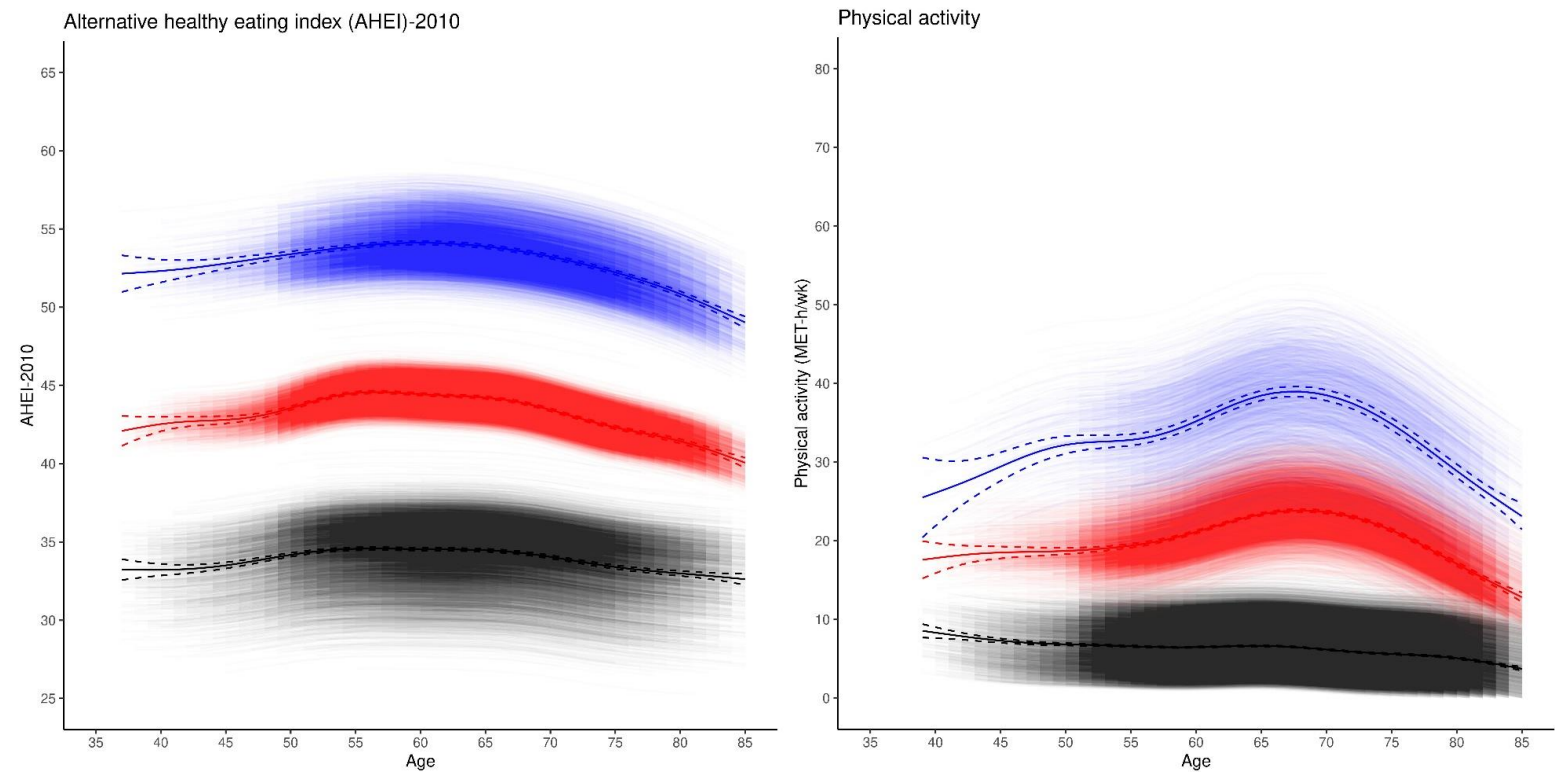



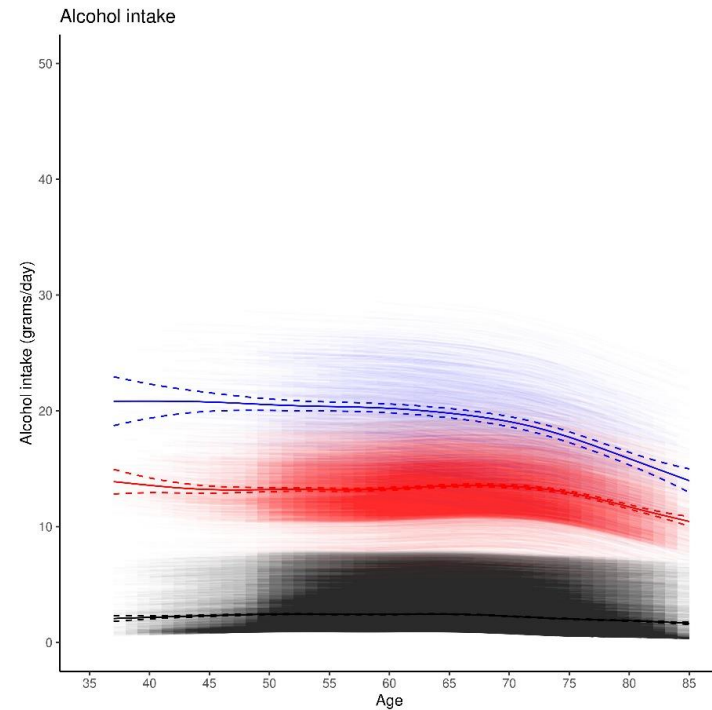

Solid line: the mean of predicted trajectories of each group; Dash line: 95% confidence interval (CI) of predicted trajectories of each group.

For AHEI-2010, physical activity, and alcohol intake, we classified trajectories using standardized values and mapped the standardized values to real values using the inverse cumulative distribution function when plotting the trajectories.

We identified patterns of risk factors using smoothing mixture models (SMM). We obtained the mean and 95% CI of predicted trajectories of each group and predicted trajectories of each participant within each group.

**Figure S4. Plots of patterns of modifiable risk factors with 95% confidence interval in the Health Professionals Follow-up Study.**

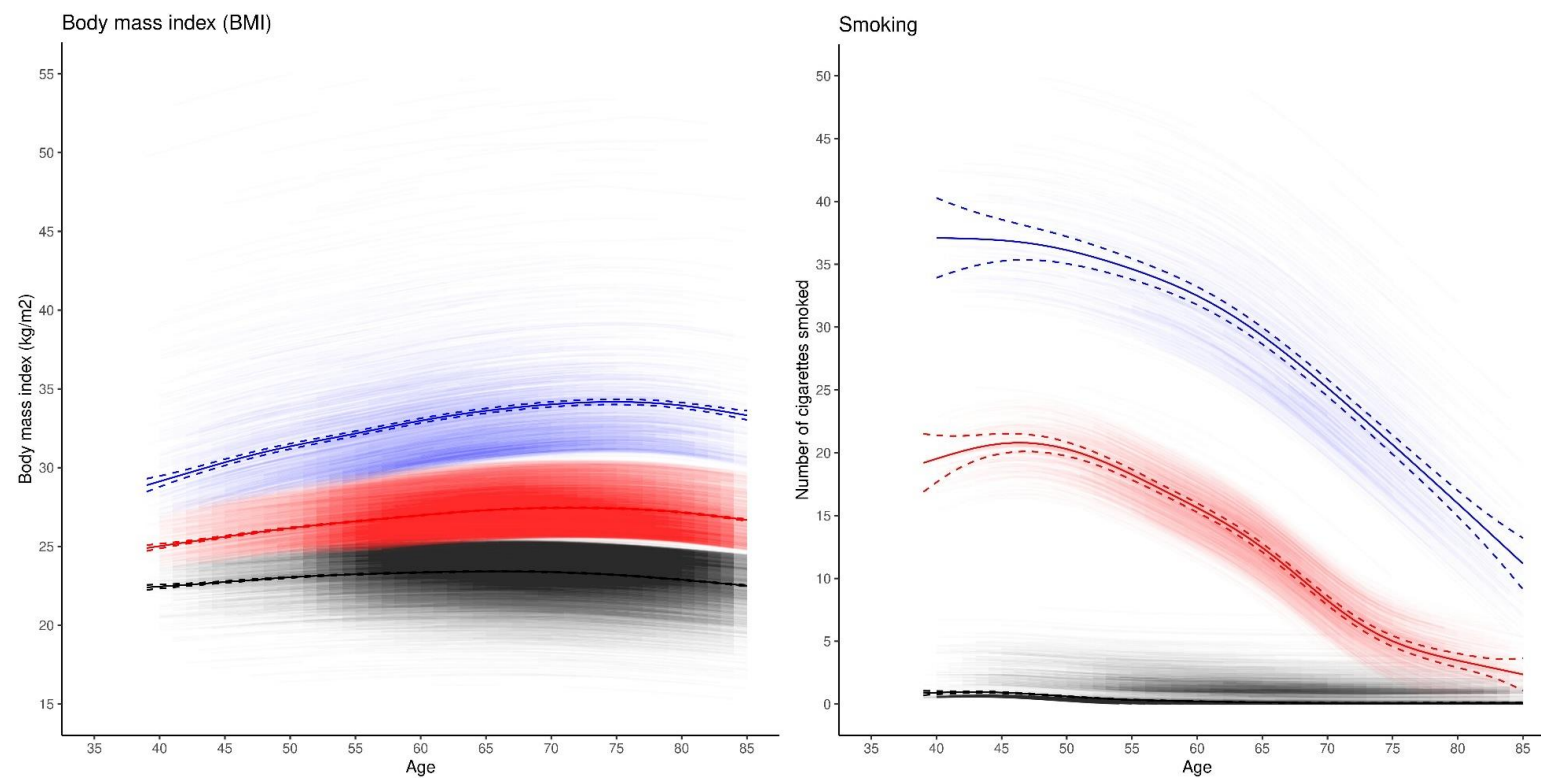

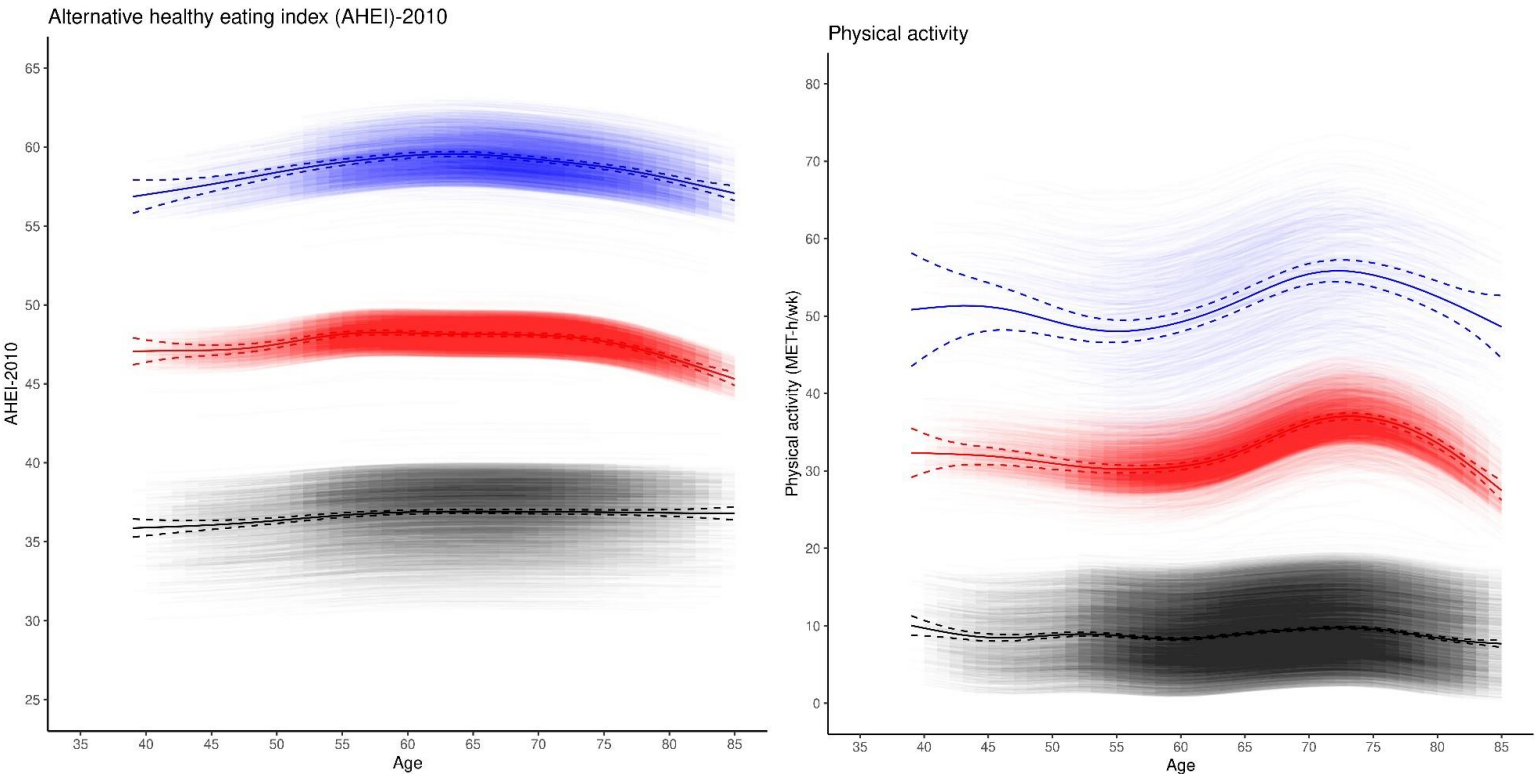

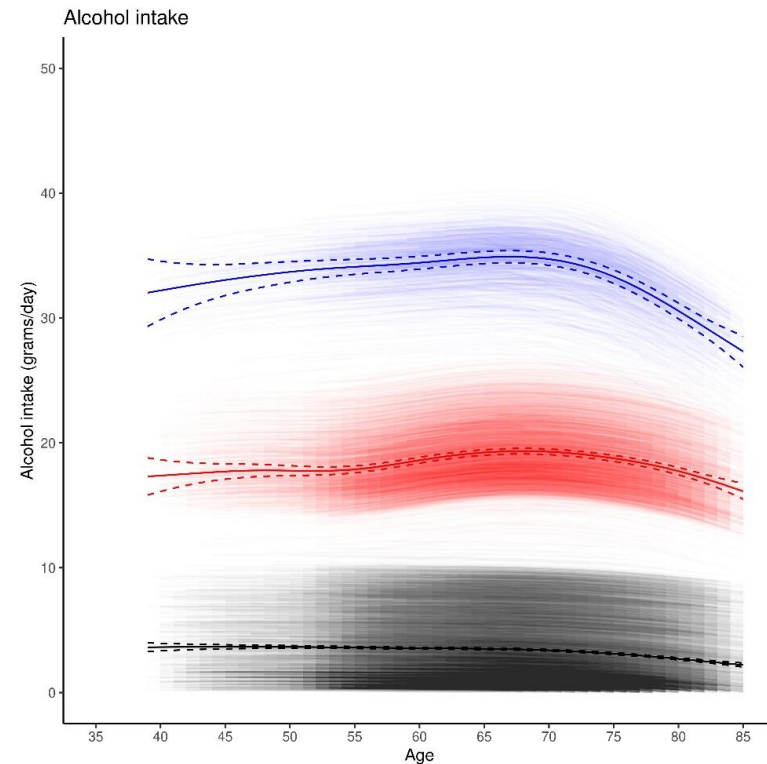

Solid line: the mean of predicted trajectories of each group; Dash line: 95% confidence interval (CI) of predicted trajectories of each group.

For AHEI-2010, physical activity, and alcohol intake, we classified trajectories using standardized values and mapped the standardized values to real values using the inverse cumulative distribution function when plotting the trajectories.

We identified patterns of risk factors using smoothing mixture models (SMM). We obtained the mean and 95% CI of predicted trajectories of each group and predicted trajectories of each participant within each group.

**Figure S5. Plots of patterns of change in modifiable risk factors from baseline with 95% confidence interval in the NHS.**

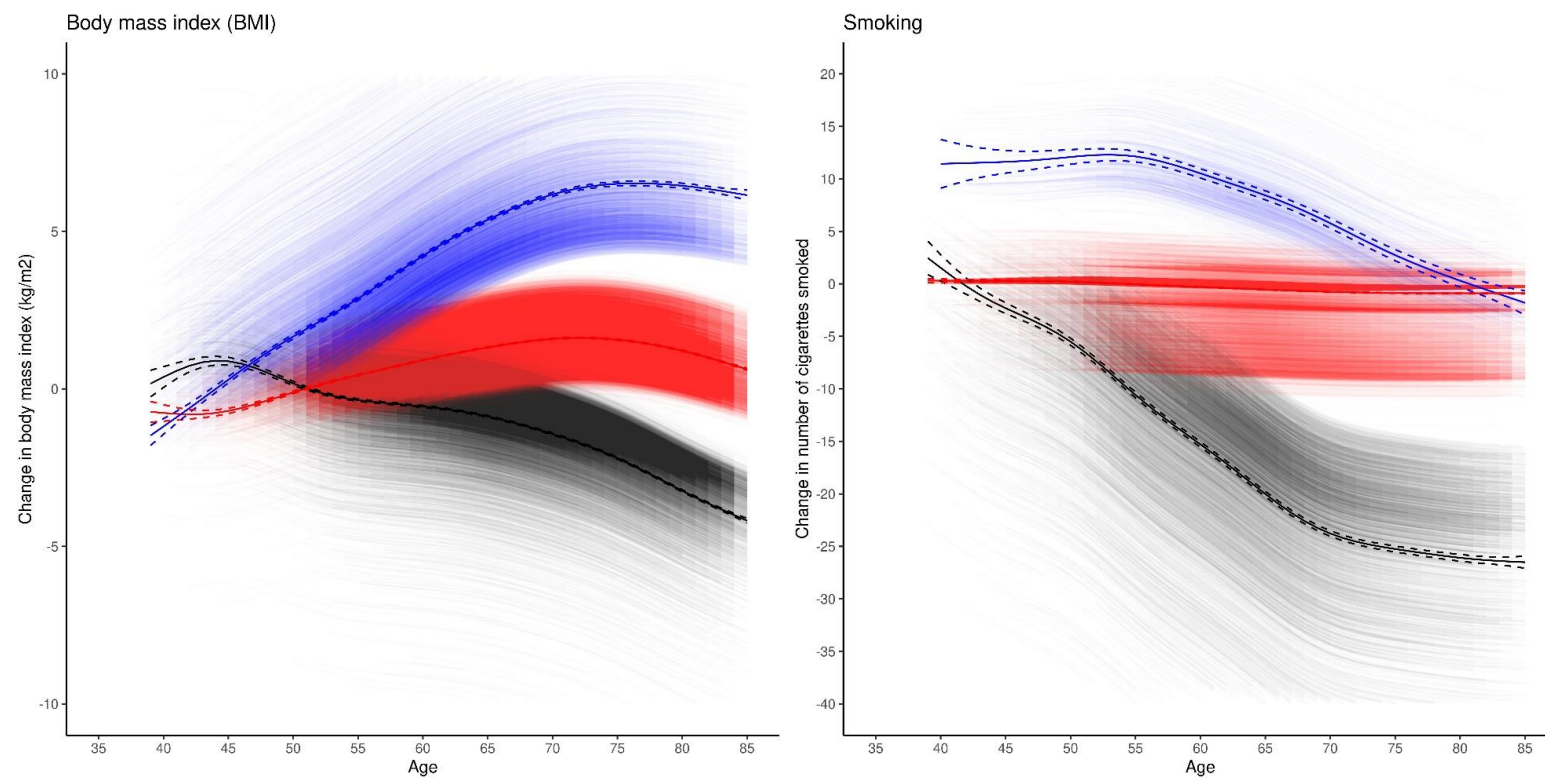

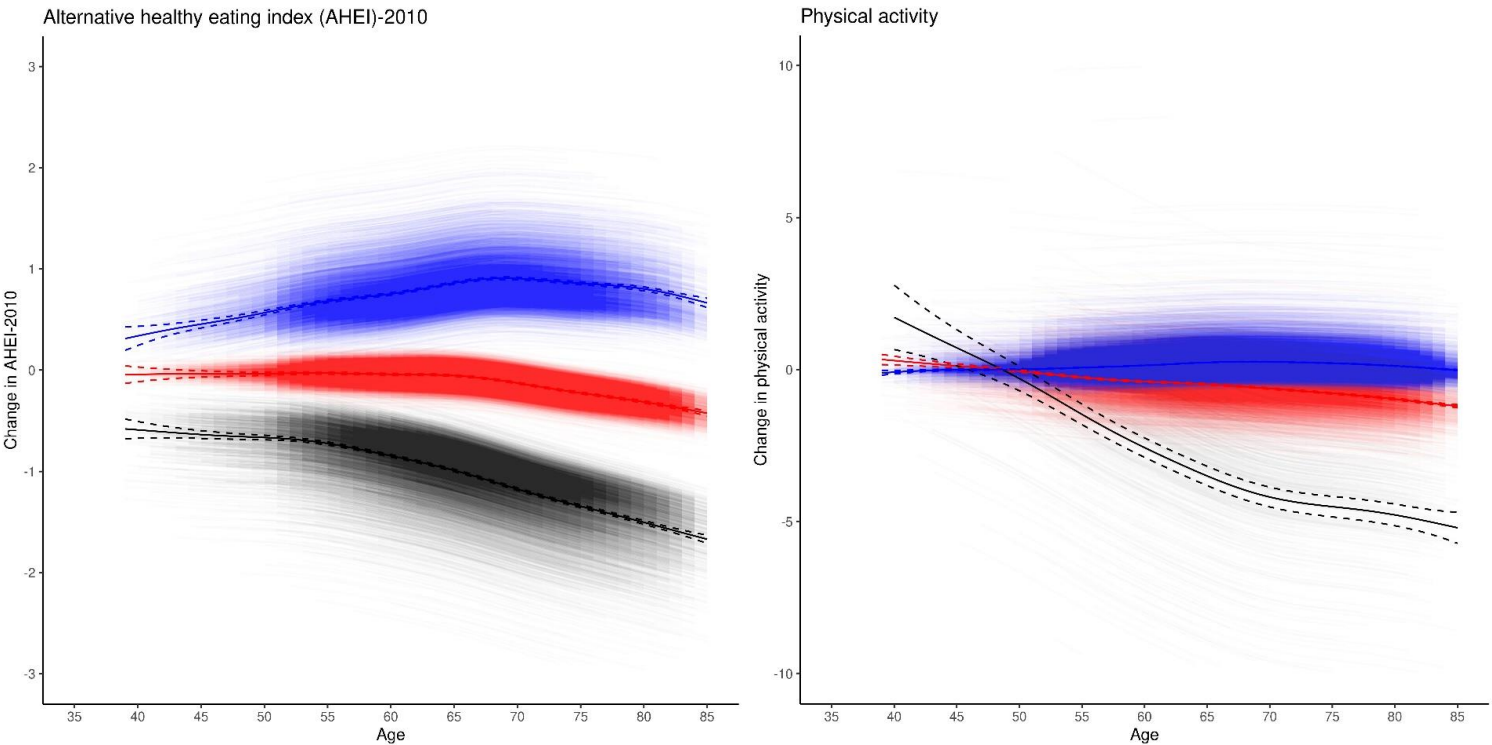

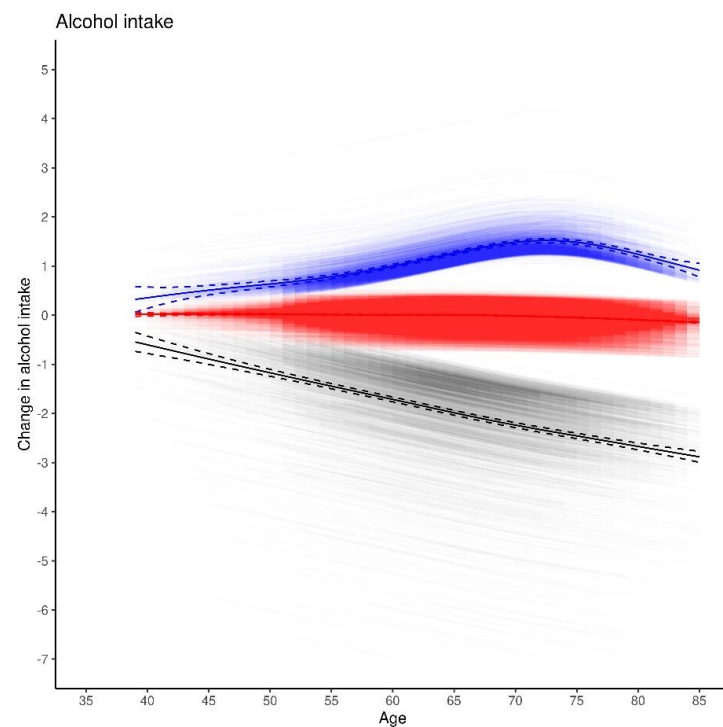

Solid line: the mean of predicted trajectories of each group; Dash line: 95% confidence interval (CI) of predicted trajectories of each group.

For change in AHEI-2010, physical activity, and alcohol intake, we plotted the trajectories in the scale of standardized values.

We identified patterns of risk factors using smoothing mixture models (SMM). We obtained the mean and 95% CI of predicted trajectories of each group and predicted trajectories of each participant within each group.



**Figure S6. Plots of patterns of change in modifiable risk factors from baseline with 95% confidence interval in the Health Professionals Follow-up Study.**

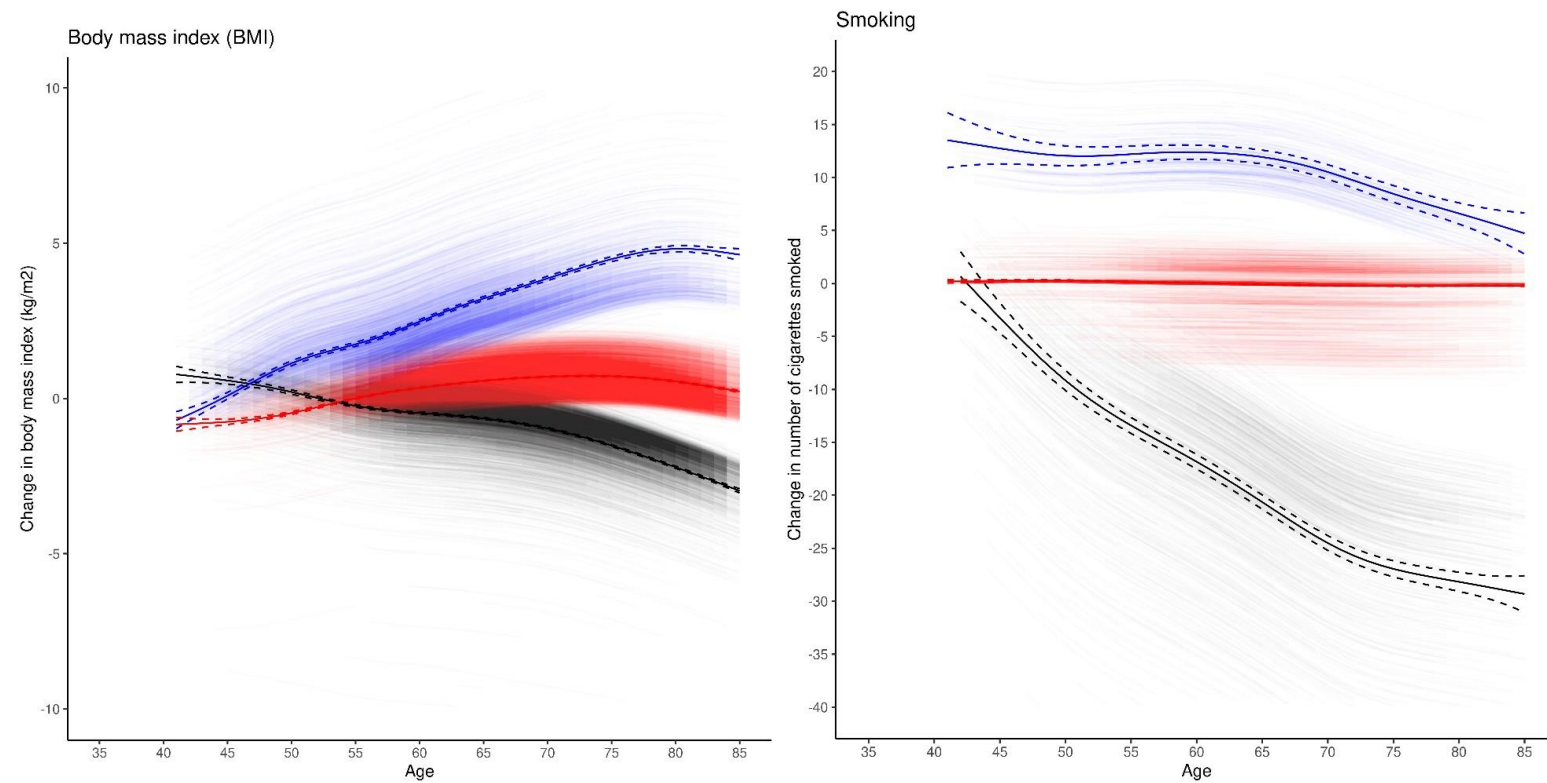



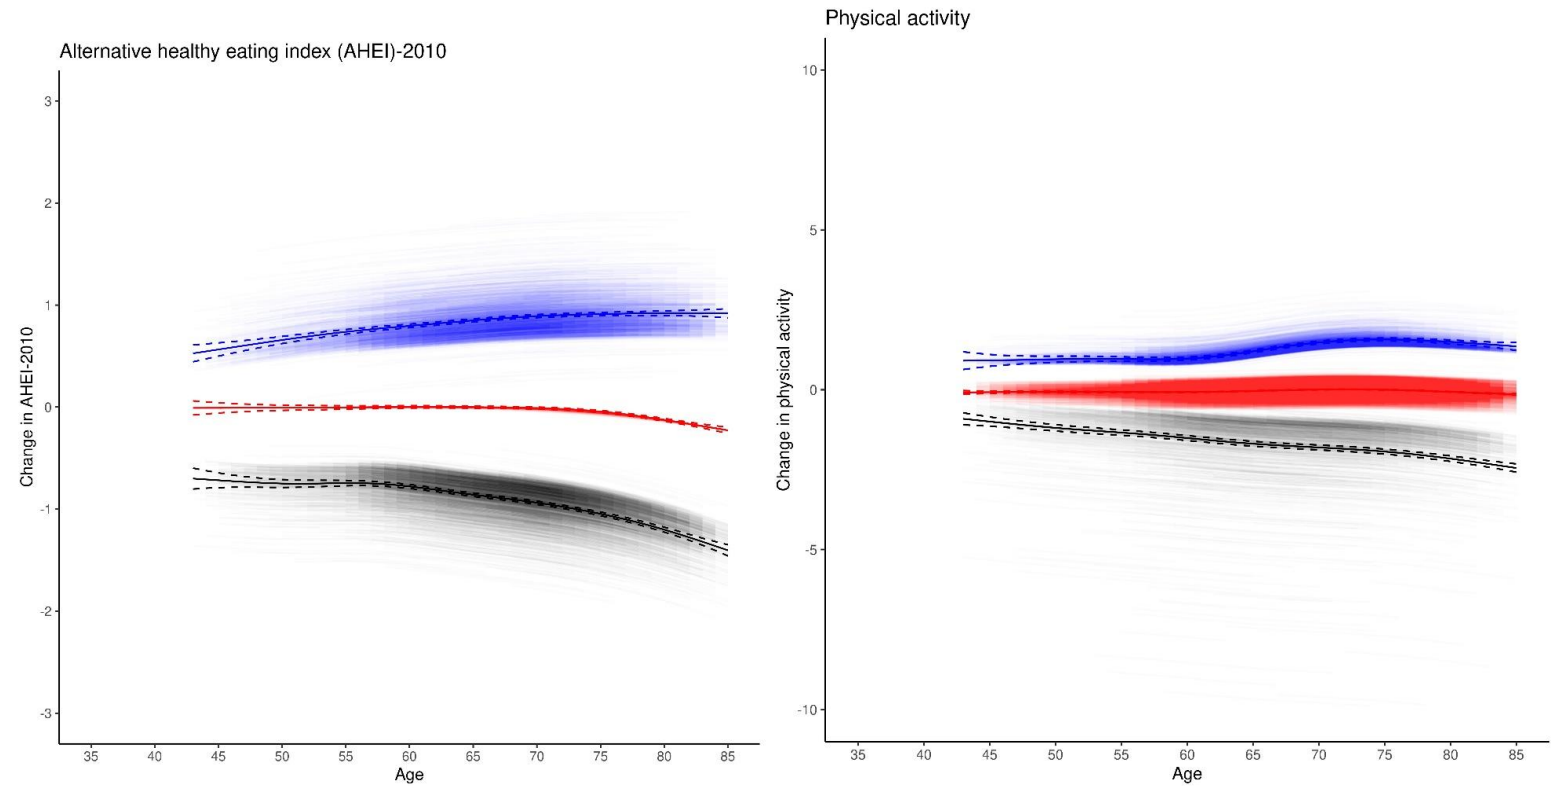

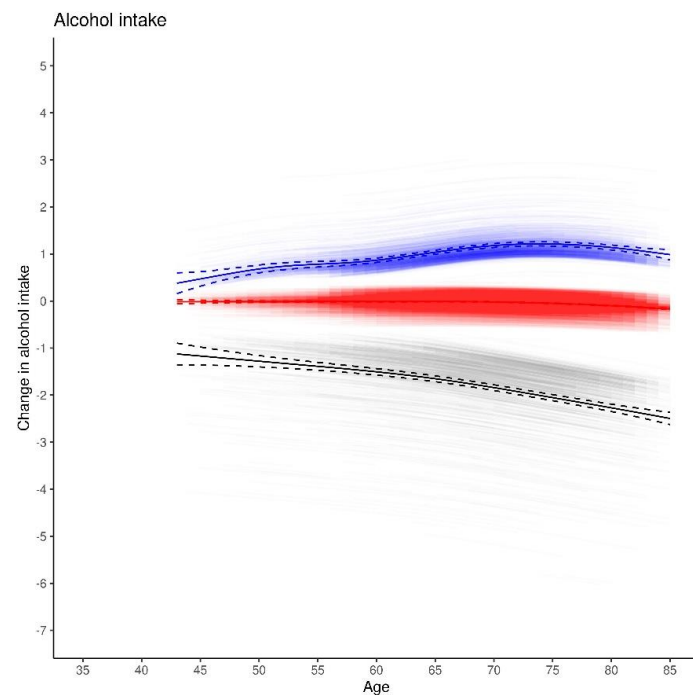

Solid line: the mean of predicted trajectories of each group; Dash line: 95% confidence interval (CI) of predicted trajectories of each group.

For change in AHEI-2010, physical activity, and alcohol intake, we plotted the trajectories in the scale of standardized values.

We identified patterns of risk factors using smoothing mixture models (SMM). We obtained the mean and 95% CI of predicted trajectories of each group and predicted trajectories of each participant within each group.

**Figure S7. Plots of joint patterns of modifiable risk factors and change in the factor from baseline in the Nurses' Health Study (women).**

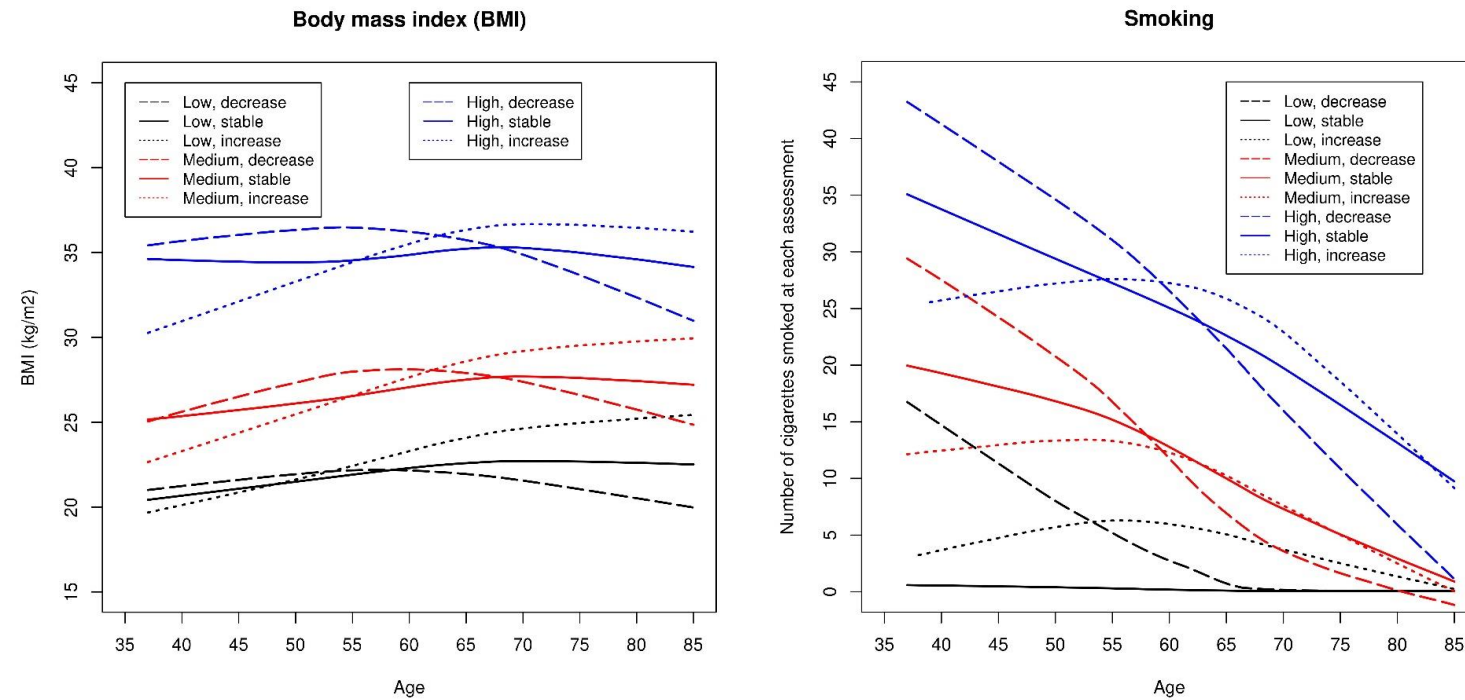

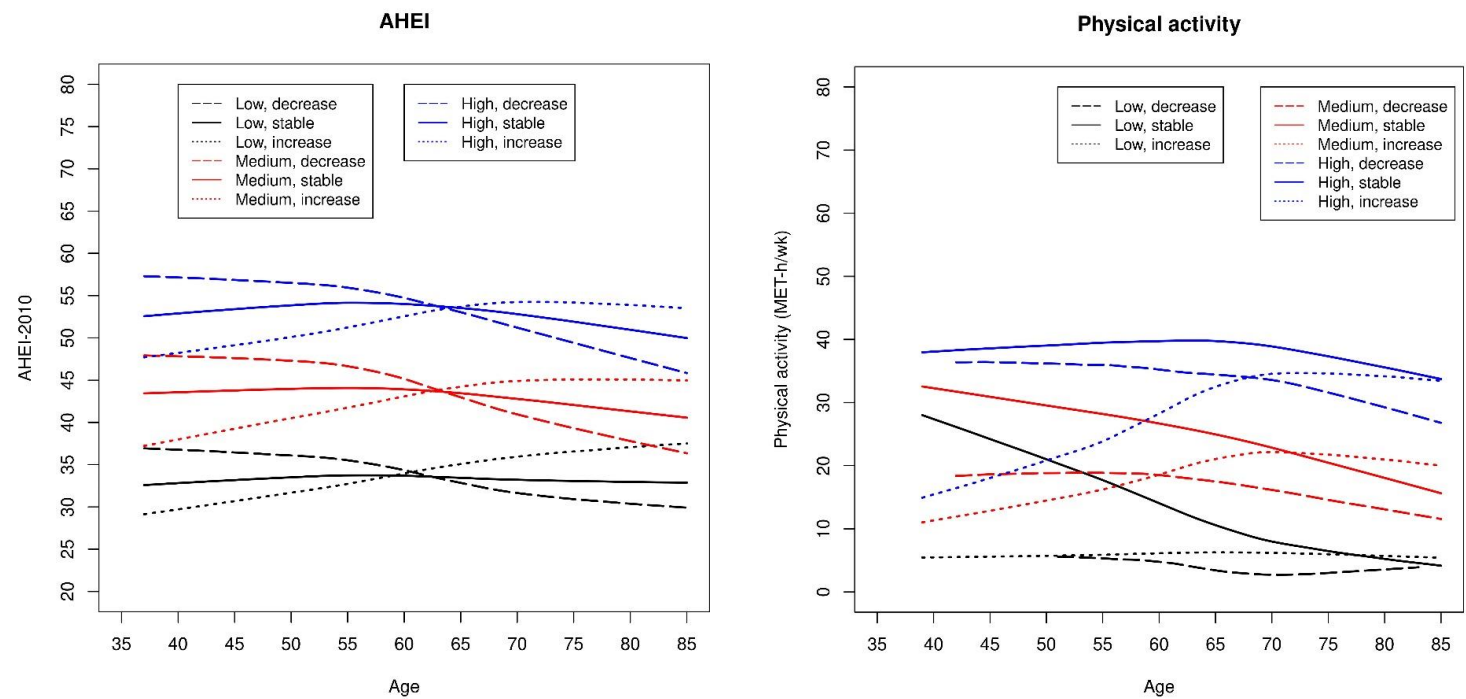

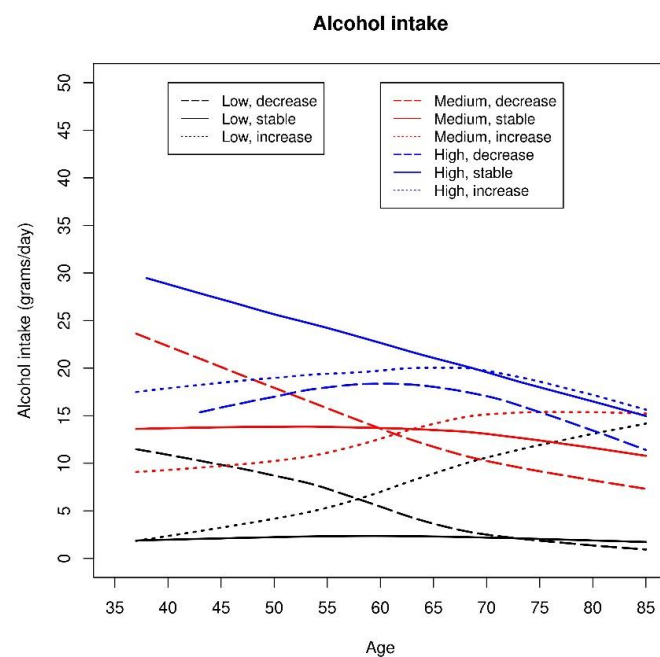

We identified patterns of risk factor and patterns of change in the risk factor using smoothing mixture models, classified participants according to joint group membership, and plotted the mean values of the risk factor with age within each category using loess.smooth function in R.

**Figure S8. Plots of joint patterns of modifiable risk factors and change in the factor from baseline in the Health Professionals Follow-up Study (men).**

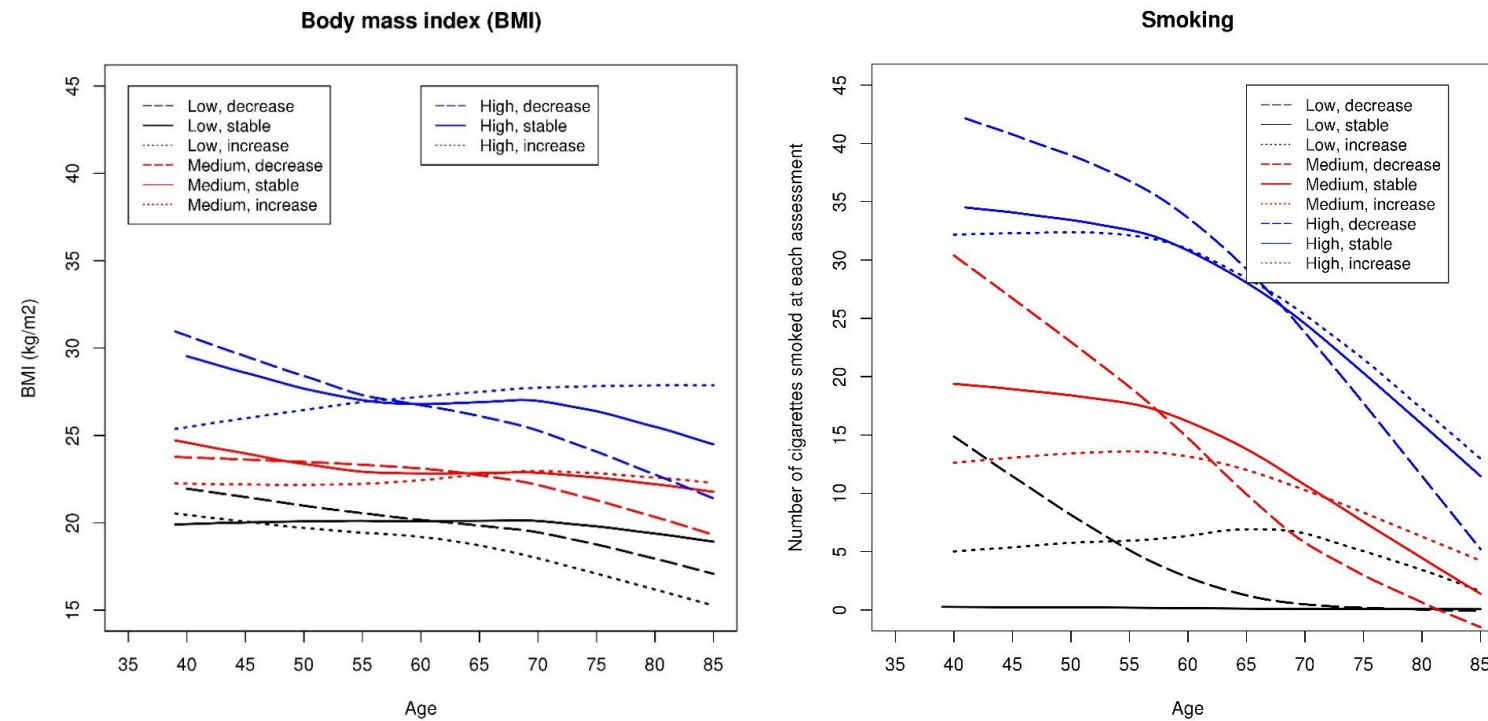

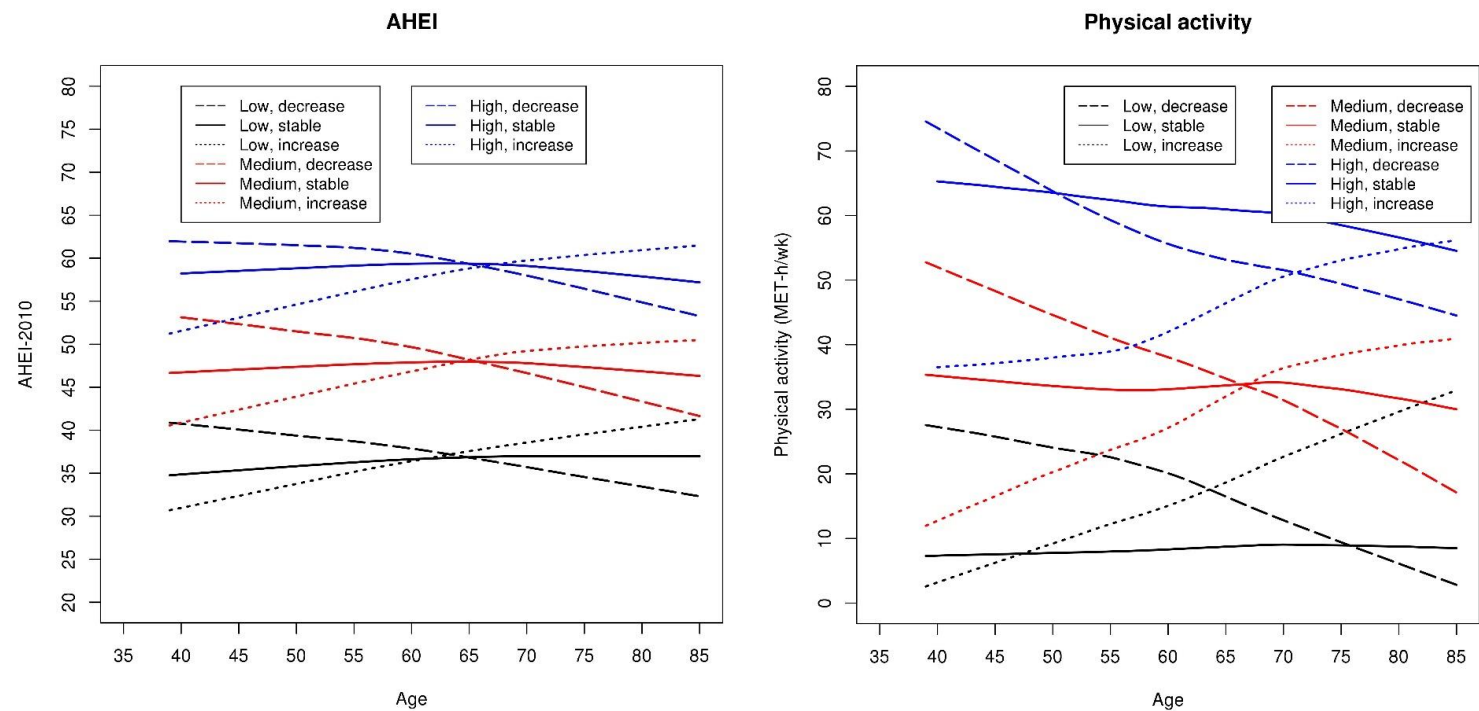

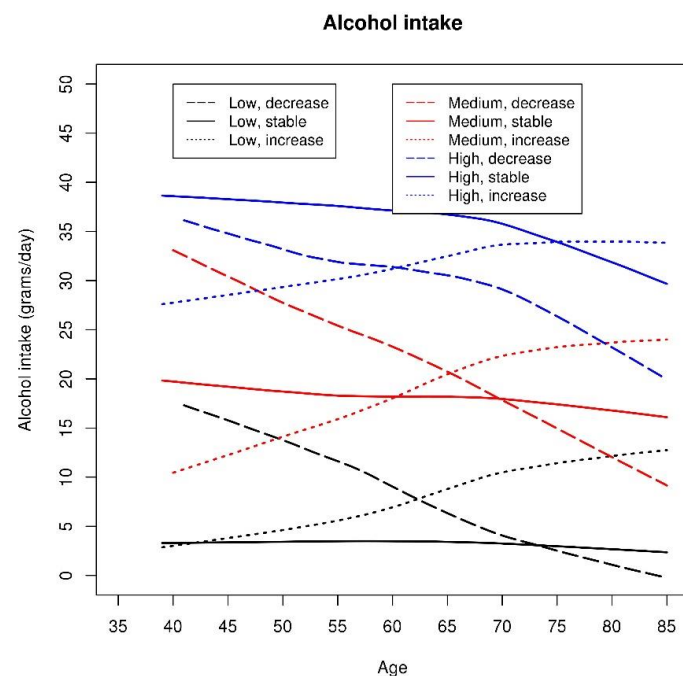

We identified patterns of risk factor and patterns of change in the risk factor using smoothing mixture models, classified participants according to joint group membership, and plotted the mean values of the risk factor with age within each category using loess.smooth function in R.



**Table S4. Associations of trajectories of modifiable risk factors and trajectories of change in the factors with odds ratios (OR) of achieving longevity in the Nurses' Health Study (women) and the Health Professionals Follow-up Study (men).**

| <b>Risk factors</b> | <b>Medium</b> | <b>Low</b>        | <b>High</b>       | <b>Change in risk factors</b> | <b>No change</b> | <b>Increase</b>   | <b>Decrease</b>   |
|---------------------|---------------|-------------------|-------------------|-------------------------------|------------------|-------------------|-------------------|
| <b>BMI</b>          |               |                   |                   | <b>BMI</b>                    |                  |                   |                   |
| <i>NHS</i>          |               |                   |                   | <i>NHS</i>                    |                  |                   |                   |
| Cases/Participants  | 11739/19645   | 14106/23841       | 2544/5807         | Cases/Participants            | 15870/23961      | 2972/6555         | 7493/14350        |
| Model 1             | 1.00          | 0.98 (0.94, 1.01) | 0.53 (0.49, 0.56) | Model 3                       | 1.00             | 0.47 (0.44, 0.50) | 0.55 (0.53, 0.58) |
| Model 2             | 1.00          | 0.96 (0.92, 1.01) | 0.58 (0.54, 0.62) | Model 4                       | 1.00             | 0.77 (0.71, 0.82) | 0.55 (0.52, 0.58) |
| <i>HPFS</i>         |               |                   |                   | <i>HPFS</i>                   |                  |                   |                   |
| Cases/Participants  | 6916/13212    | 7999/14210        | 1047/2947         | Cases/Participants            | 9225/14734       | 1099/3254         | 4122/8398         |
| Model 1             | 1.00          | 1.17 (1.12, 1.23) | 0.50 (0.46, 0.54) | Model 3                       | 1.00             | 0.35 (0.32, 0.38) | 0.57 (0.54, 0.60) |
| Model 2             | 1.00          | 1.04 (0.98, 1.09) | 0.62 (0.57, 0.68) | Model 4                       | 1.00             | 0.63 (0.57, 0.69) | 0.59 (0.56, 0.63) |
| <b>Smoking</b>      |               |                   |                   | <b>Smoking</b>                |                  |                   |                   |
| <i>NHS</i>          |               |                   |                   | <i>NHS</i>                    |                  |                   |                   |
| Cases/Participants  | 2497/6731     | 25206/39752       | 889/3484          | Cases/Participants            | 25781/41782      | 322/932           | 2004/5627         |
| Model 1             | 1.00          | 2.94 (2.79, 3.10) | 0.58 (0.53, 0.64) | Model 3                       | 1.00             | 0.55 (0.48, 0.64) | 1.28 (1.16, 1.42) |
| Model 2             | 1.00          | 2.80 (2.63, 2.98) | 0.54 (0.48, 0.60) | Model 4                       | 1.00             | 0.72 (0.60, 0.85) | 1.24 (1.10, 1.39) |
| <i>HPFS</i>         |               |                   |                   | <i>HPFS</i>                   |                  |                   |                   |
| Cases/Participants  | 608/2086      | 15431/28238       | 206/904           | Cases/Participants            | 14144/25505      | 205/715           | 332/1145          |
| Model 1             | 1.00          | 2.93 (2.66, 3.23) | 0.72 (0.60, 0.86) | Model 3                       | 1.00             | 0.36 (0.29, 0.44) | 1.59 (1.28, 1.98) |
| Model 2             | 1.00          | 2.68 (2.41, 2.97) | 0.61 (0.51, 0.75) | Model 4                       | 1.00             | 0.49 (0.39, 0.60) | 1.50 (1.19, 1.89) |
| <b>AHEI</b>         |               |                   |                   | <b>AHEI</b>                   |                  |                   |                   |
| <i>NHS</i>          |               |                   |                   | <i>NHS</i>                    |                  |                   |                   |
| Cases/Participants  | 13237/22388   | 8102/16135        | 7316/11346        | Cases/Participants            | 13321/21554      | 7696/12937        | 6536/11571        |
| Model 1             | 1.00          | 0.70 (0.67, 0.73) | 1.25 (1.20, 1.32) | Model 3                       | 1.00             | 1.02 (0.97, 1.08) | 0.67 (0.64, 0.71) |
| Model 2             | 1.00          | 0.83 (0.79, 0.87) | 1.06 (1.01, 1.12) | Model 4                       | 1.00             | 1.07 (1.00, 1.13) | 0.82 (0.77, 0.87) |
| <i>HPFS</i>         |               |                   |                   | <i>HPFS</i>                   |                  |                   |                   |
| Cases/Participants  | 7202/13082    | 4293/8976         | 4492/7626         | Cases/Participants            | 6697/10899       | 3415/6146         | 3418/5958         |
| Model 1             | 1.00          | 0.75 (0.71, 0.79) | 1.17 (1.11, 1.24) | Model 3                       | 1.00             | 0.98 (0.91, 1.05) | 0.64 (0.59, 0.69) |
| Model 2             | 1.00          | 0.88 (0.83, 0.93) | 1.02 (0.96, 1.09) | Model 4                       | 1.00             | 0.97 (0.89, 1.05) | 0.78 (0.71, 0.84) |

| Physical activity  |            |                   |                   | Physical activity  |             |                   |                   |
|--------------------|------------|-------------------|-------------------|--------------------|-------------|-------------------|-------------------|
| <i>NHS</i>         |            |                   |                   | <i>NHS</i>         |             |                   |                   |
| Cases/Participants | 9126/14243 | 17522/32088       | 1671/2738         | Cases/Participants | 4811/7763   | 20513/35799       | 279/497           |
| Model 1            | 1.00       | 0.67 (0.65, 0.70) | 0.88 (0.81, 0.96) | Model 3            | 1.00        | 1.12 (1.04, 1.22) | 0.55 (0.43, 0.71) |
| Model 2            | 1.00       | 0.75 (0.72, 0.79) | 0.90 (0.82, 0.99) | Model 4            | 1.00        | 1.10 (1.01, 1.19) | 0.81 (0.62, 1.05) |
| <i>HPFS</i>        |            |                   |                   | <i>HPFS</i>        |             |                   |                   |
| Cases/Participants | 5474/9624  | 10549/22241       | 958/1839          | Cases/Participants | 12051/22581 | 2542/4588         | 980/2073          |
| Model 1            | 1.00       | 0.68 (0.65, 0.72) | 0.82 (0.75, 0.91) | Model 3            | 1.00        | 0.94 (0.86, 1.02) | 0.52 (0.46, 0.58) |
| Model 2            | 1.00       | 0.65 (0.62, 0.69) | 0.88 (0.79, 0.98) | Model 4            | 1.00        | 1.03 (0.94, 1.13) | 0.64 (0.56, 0.73) |
| Alcohol intake     |            |                   |                   | Alcohol intake     |             |                   |                   |
| <i>NHS</i>         |            |                   |                   | <i>NHS</i>         |             |                   |                   |
| Cases/Participants | 5862/10019 | 21292/36703       | 1501/3147         | Cases/Participants | 24113/39576 | 2192/3881         | 1248/2605         |
| Model 1            | 1.00       | 0.98 (0.94, 1.02) | 0.65 (0.60, 0.70) | Model 3            | 1.00        | 0.83 (0.76, 0.90) | 0.63 (0.57, 0.71) |
| Model 2            | 1.00       | 0.99 (0.93, 1.04) | 0.78 (0.71, 0.85) | Model 4            | 1.00        | 1.06 (0.97, 1.17) | 0.82 (0.72, 0.93) |
| <i>HPFS</i>        |            |                   |                   | <i>HPFS</i>        |             |                   |                   |
| Cases/Participants | 4556/8049  | 10110/18783       | 1371/2929         | Cases/Participants | 11403/18922 | 1488/2721         | 725/1501          |
| Model 1            | 1.00       | 0.89 (0.85, 0.94) | 0.67 (0.62, 0.73) | Model 3            | 1.00        | 0.72 (0.66, 0.79) | 0.67 (0.58, 0.77) |
| Model 2            | 1.00       | 0.84 (0.79, 0.89) | 0.74 (0.68, 0.81) | Model 4            | 1.00        | 0.95 (0.85, 1.05) | 0.77 (0.66, 0.90) |

Model 1 is univariate analysis.

Model 2 adjusted for baseline age (continuous), race (White, Black, Asian, and other), family histories of cancer (yes, no), myocardial infarction (yes, no), and type 2 diabetes (yes, no), multivitamin use (yes, no), menopausal status (yes, no, women only), postmenopausal hormone use (yes, no, women only), cohort, education (registered nurse, bachelor degree, master degree and higher, women only), social economic status (annual family income [quartiles] for women and work status [disabled, retired, part-time, full-time] for men), aspirin use (yes, no), use of antihypertensive medications (yes, no), and use of cholesterol lowering medications (yes, no), and the other four risk factors at baseline as continuous variables.

Model 3 adjusted for all variables included in model 1, as well as group membership of trajectories of the risk factor (categorical).

Model 4 adjusted for all variables included in model 2, as well as group membership of trajectories of the risk factor (categorical).

Table S5. Assignment of score (1-9) to each risk factor based on the joint patterns.

| Joint patterns   | BMI | Smoking | AHEI | Physical activity | Alcohol intake |
|------------------|-----|---------|------|-------------------|----------------|
| Low, decrease    | 3   | 2       | 9    | 9                 | 6              |
| Low, stable      | 1   | 1       | 8    | 8                 | 4              |
| Low, increase    | 5   | 3       | 7    | 7                 | 3              |
| Medium, decrease | 4   | 4       | 6    | 5                 | 5              |
| Medium, stable   | 2   | 5       | 5    | 3                 | 1              |
| Medium, increase | 6   | 6       | 4    | 2                 | 2              |
| High, decrease   | 8   | 7       | 3    | 6                 | 8              |
| High, stable     | 7   | 8       | 2    | 4                 | 7              |
| High, increase   | 9   | 9       | 1    | 1                 | 9              |

**Figure S9. Plots of patterns of modifiable risk factors with 95% confidence interval in the Nurses' Health Study using group-based trajectory analysis.**

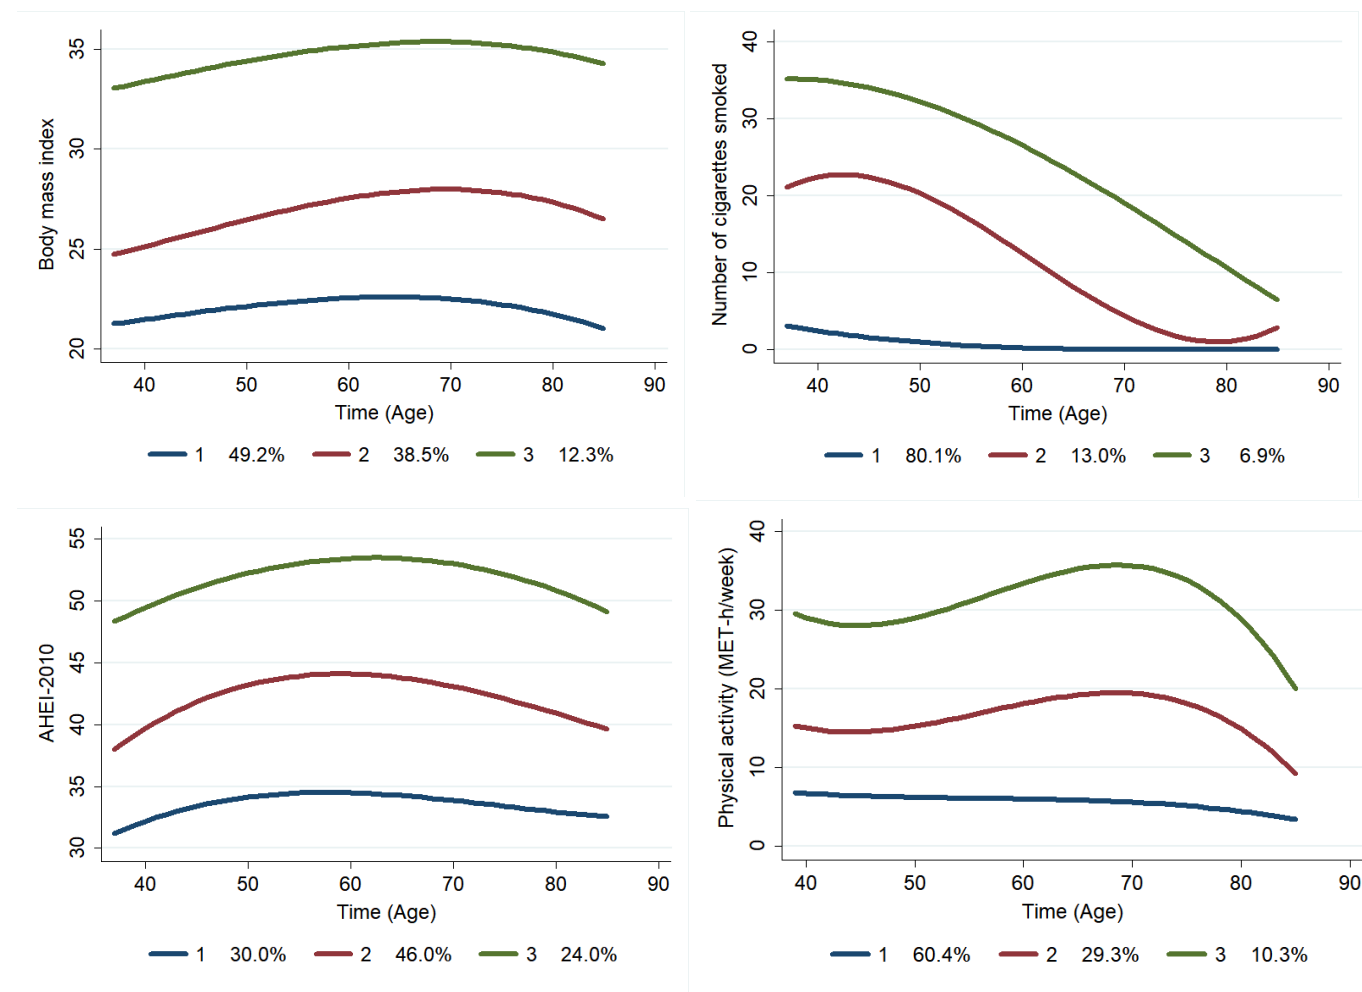

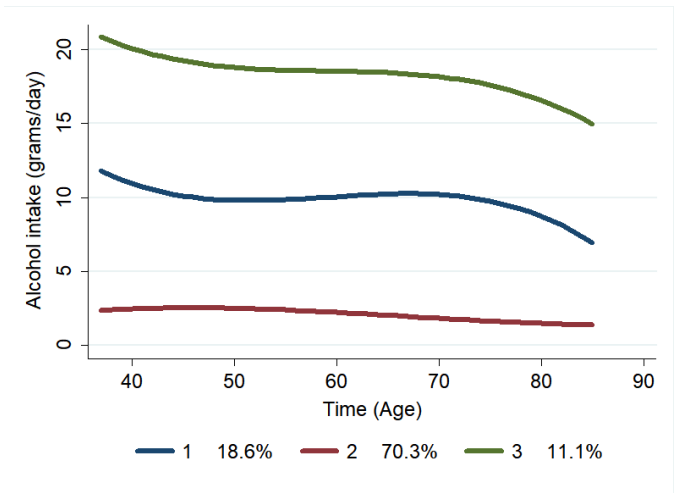

**Figure S10. Plots of patterns of modifiable risk factors with 95% confidence interval in the Health Professionals Follow-up Study using group-based trajectory analysis.**

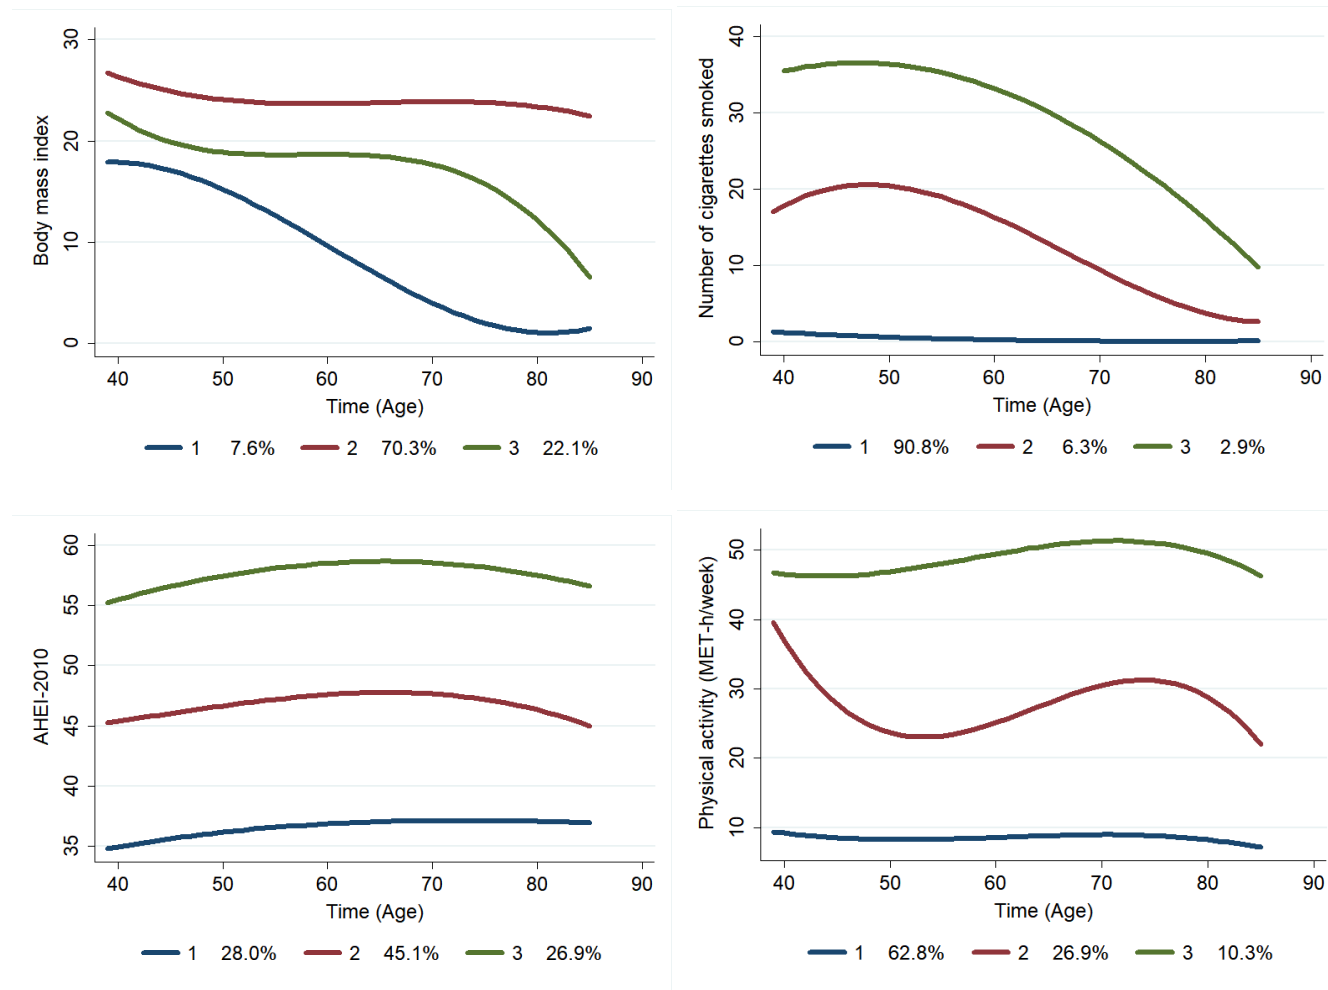

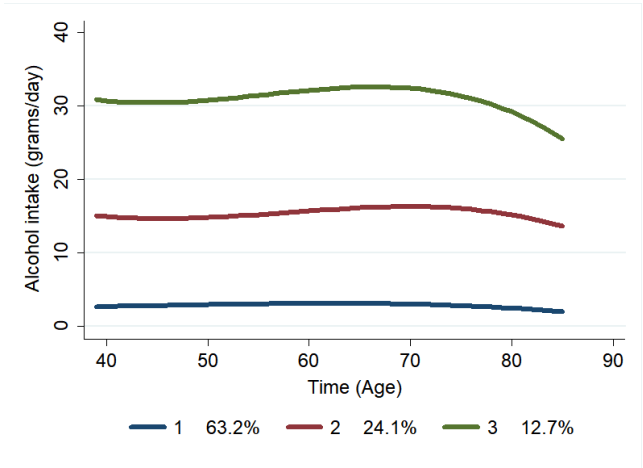

**Figure S11. Plots of patterns of change in modifiable risk factors from baseline with 95% confidence interval in the Nurses' Health Study using group-based trajectory analysis.**

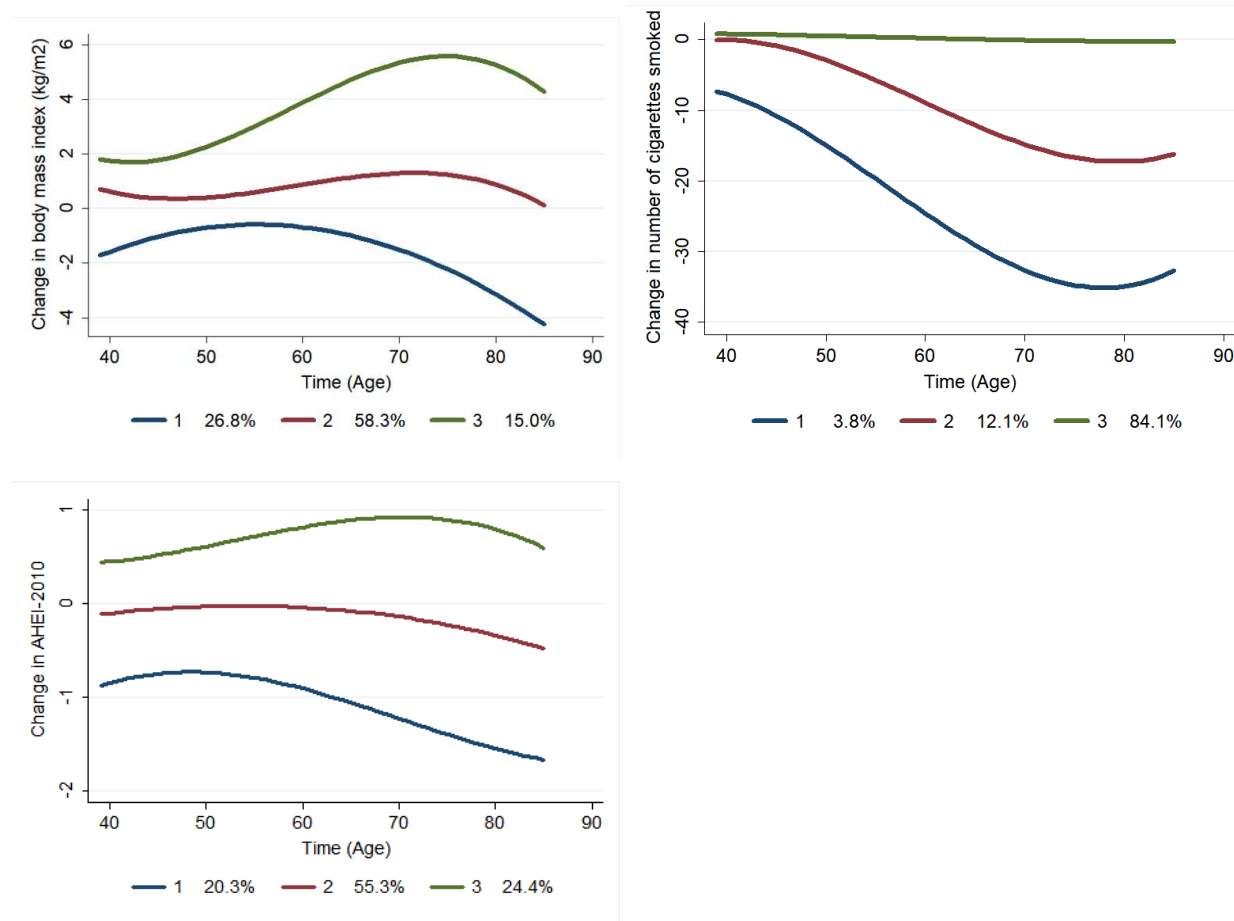

Note: We did not obtain valid model output for change in alcohol intake and physical activity due to the ERROR "Floating Point Zero Divide".



**Figure S12. Plots of patterns of change in modifiable risk factors from baseline with 95% confidence interval in the Health Professionals Follow-up Study using group-based trajectory analysis.**

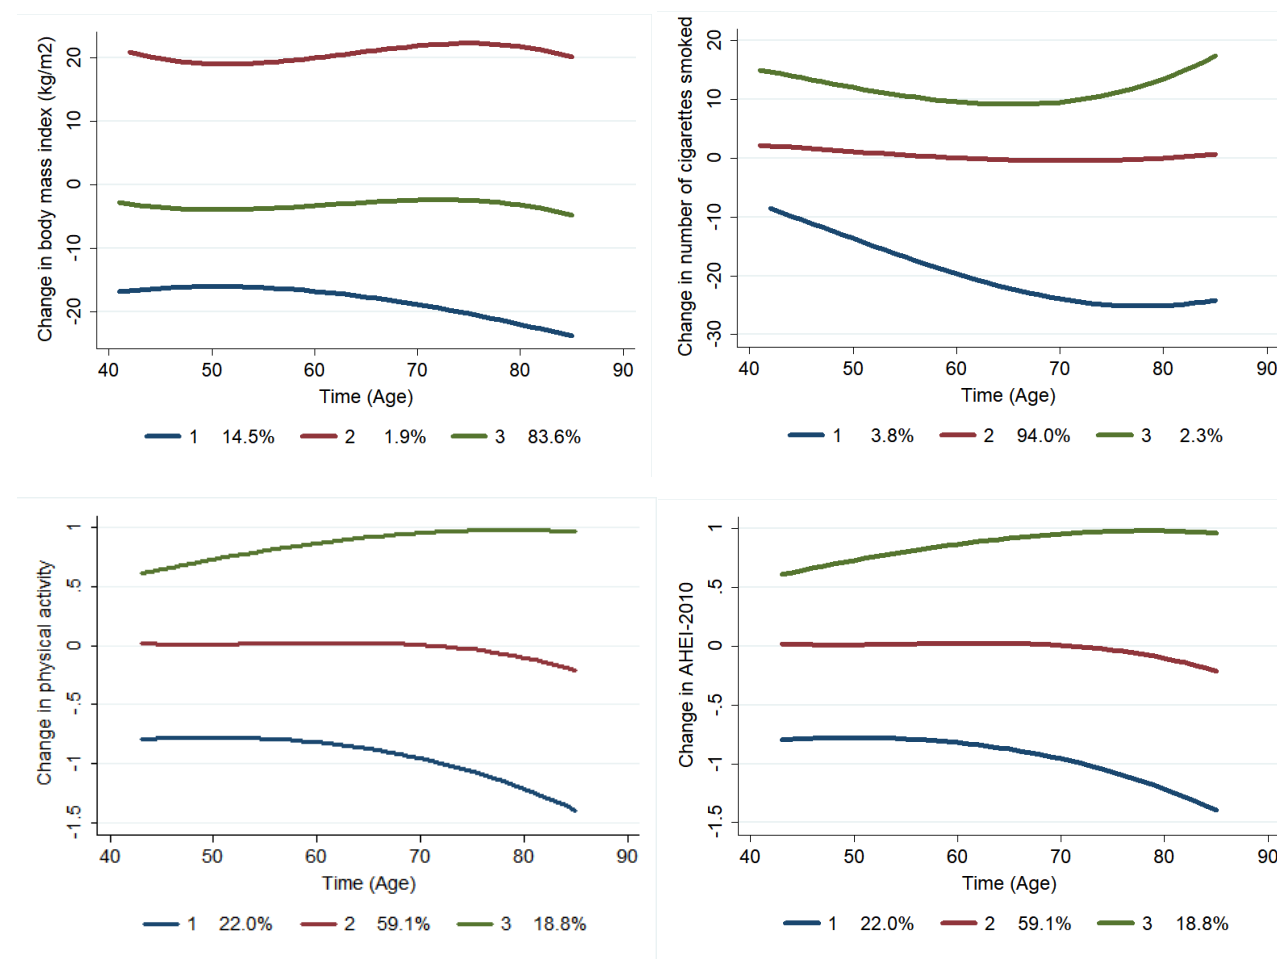

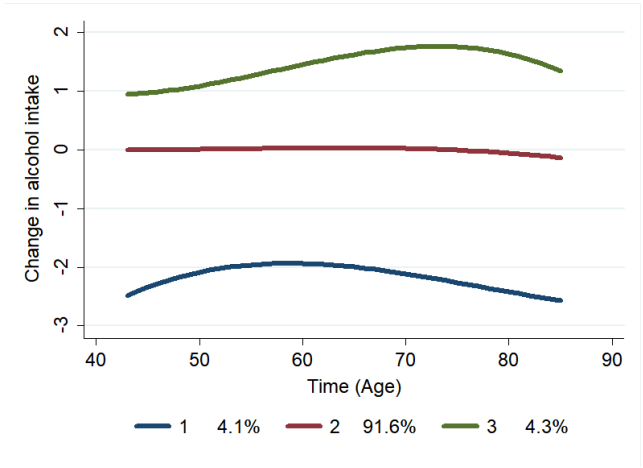

**Table S6. Comparison of classification of trajectories of risk factors and change in risk factors using smoothing mixture model and group-based trajectory model by pooling the Nurses' Health Study and the Health Professionals Follow-up Study.**

| Classification of trajectories of risk factors |        |                              |        |       |                      | Classification of trajectories of change in risk factors |          |                              |        |          |                      |
|------------------------------------------------|--------|------------------------------|--------|-------|----------------------|----------------------------------------------------------|----------|------------------------------|--------|----------|----------------------|
|                                                |        | Group-based trajectory model |        |       | Spearman correlation |                                                          |          | Group-based trajectory model |        |          | Spearman correlation |
| BMI                                            |        | Low                          | Medium | High  |                      | BMI                                                      |          | Decrease                     | Stable | Increase |                      |
|                                                | Low    | 22636                        | 704    | 137   |                      |                                                          | Decrease | 21580                        | 10371  | 170      |                      |
| Smoothing mixture model                        | Medium | 13714                        | 29666  | 2718  |                      | Smoothing mixture model                                  | Stable   | 564                          | 18256  | 1628     |                      |
|                                                | High   | 1719                         | 2501   | 5902  | 0.65                 |                                                          | Increase | 614                          | 10086  | 8014     | 0.7                  |
| Smoking                                        |        | Low                          | Medium | High  |                      | Smoking                                                  |          | Decrease                     | Stable | Increase |                      |
|                                                | Low    | 63550                        | 10     | 3     |                      |                                                          | Decrease | 63562                        | 6127   | 8        |                      |
| Smoothing mixture model                        | Medium | 159                          | 4460   | 4382  |                      | Smoothing mixture model                                  | Stable   | 2381                         | 556    | 694      |                      |
|                                                | High   | 4306                         | 4355   | 6     | 0.79                 |                                                          | Increase | 1371                         | 96     | 946      | 0.27                 |
| AHEI-2010                                      |        | Low                          | Medium | High  |                      | AHEI-2010                                                |          | Decrease                     | Stable | Increase |                      |
|                                                | Low    | 22231                        | 488    | 2     |                      |                                                          | Decrease | 17578                        | 16946  | 152      |                      |
| Smoothing mixture model                        | Medium | 2898                         | 33359  | 1225  |                      | Smoothing mixture model                                  | Stable   | 144                          | 15508  | 12644    |                      |
|                                                | High   | 1                            | 1630   | 17756 | 0.93                 |                                                          | Increase | 0                            | 12     | 6113     | 0.75                 |
| Physical activity                              |        | Low                          | Medium | High  |                      | Physical activity                                        |          | Decrease                     | Stable | Increase |                      |
|                                                | Low    | 27647                        | 7072   | 461   |                      |                                                          | Decrease | 2039                         | 11870  | 0        |                      |
| Smoothing mixture model                        | Medium | 26705                        | 9990   | 640   |                      | Smoothing mixture model                                  | Stable   | 34                           | 10713  | 3778     |                      |
|                                                | High   | 2                            | 6814   | 3477  | 0.4                  |                                                          | Increase | 0                            | 1      | 811      | 0.51                 |
| Alcohol intake                                 |        | Low                          | Medium | High  |                      | Alcohol intake                                           |          | Decrease                     | Stable | Increase |                      |
|                                                | Low    | 49826                        | 564    | 1373  |                      |                                                          | Decrease | 7                            | 2131   | 1971     |                      |
| Smoothing mixture model                        | Medium | 5687                         | 11844  | 579   |                      | Smoothing mixture model                                  | Stable   | 1494                         | 16793  | 162      |                      |
|                                                | High   | 1                            | 5667   | 4126  | 0.8                  |                                                          | Increase | 0                            | 2      | 588      | 0.32                 |

**Table S7. Stratified analysis by age at baseline on associations of joint patterns of modifiable risk factors and change in the factor from baseline with odds ratios (OR) of achieving longevity by pooling the Nurses' Health Study and the Health Professionals Follow-up Study.**

|                  | Age at baseline <65 years           |                                                | Age at baseline ≥65 years           |                                                |                                    |
|------------------|-------------------------------------|------------------------------------------------|-------------------------------------|------------------------------------------------|------------------------------------|
|                  | Probability of achieving longevity* | Odds ratio of achieving longevity <sup>#</sup> | Probability of achieving longevity* | Odds ratio of achieving longevity <sup>#</sup> | P for interaction <sup>&amp;</sup> |
| <b>BMI</b>       |                                     |                                                |                                     |                                                |                                    |
| High, decrease   | 0.40 (0.37, 0.43)                   | 0.37 (0.33, 0.42)                              | 0.42 (0.32, 0.53)                   | 0.28 (0.18, 0.45)                              |                                    |
| High, increase   | 0.53 (0.50, 0.55)                   | 0.62 (0.55, 0.70)                              | 0.78 (0.59, 0.90)                   | 1.37 (0.57, 3.30)                              |                                    |
| High, stable     | 0.52 (0.49, 0.54)                   | 0.60 (0.54, 0.67)                              | 0.60 (0.52, 0.67)                   | 0.57 (0.41, 0.80)                              |                                    |
| Low, decrease    | 0.51 (0.50, 0.52)                   | 0.58 (0.55, 0.62)                              | 0.61 (0.58, 0.65)                   | 0.61 (0.53, 0.72)                              |                                    |
| Low, increase    | 0.58 (0.53, 0.62)                   | 0.77 (0.64, 0.92)                              | 0.72 (0.42, 0.90)                   | 0.99 (0.28, 3.56)                              |                                    |
| Low, stable      | 0.67 (0.65, 0.68)                   | 1.11 (1.05, 1.18)                              | 0.71 (0.68, 0.74)                   | 0.95 (0.82, 1.10)                              |                                    |
| Medium, decrease | 0.51 (0.49, 0.52)                   | 0.58 (0.54, 0.62)                              | 0.58 (0.54, 0.62)                   | 0.53 (0.44, 0.64)                              |                                    |
| Medium, increase | 0.64 (0.62, 0.66)                   | 0.98 (0.90, 1.08)                              | 0.64 (0.51, 0.75)                   | 0.67 (0.39, 1.16)                              |                                    |
| Medium, stable   | 0.64 (0.63, 0.65)                   | Ref                                            | 0.72 (0.69, 0.75)                   | Ref                                            | <0.001                             |
| <b>Smoking</b>   |                                     |                                                |                                     |                                                |                                    |
| High, decrease   | 0.24 (0.21, 0.27)                   | 0.59 (0.49, 0.70)                              | 0.35 (0.23, 0.48)                   | 0.44 (0.22, 0.86)                              |                                    |
| High, increase   | 0.26 (0.21, 0.31)                   | 0.64 (0.49, 0.84)                              | 0.32 (0.17, 0.52)                   | 0.39 (0.15, 0.97)                              |                                    |
| High, stable     | 0.25 (0.23, 0.28)                   | 0.63 (0.54, 0.72)                              | 0.40 (0.32, 0.49)                   | 0.55 (0.34, 0.92)                              |                                    |
| Low, decrease    | 0.49 (0.45, 0.53)                   | 1.75 (1.46, 2.10)                              | 0.50 (0.28, 0.73)                   | NA                                             |                                    |
| Low, increase    | 0.38 (0.31, 0.46)                   | 1.15 (0.83, 1.61)                              | 0.68 (0.66, 0.71)                   | 0.83 (0.30, 2.33)                              |                                    |
| Low, stable      | 0.64 (0.63, 0.65)                   | 3.25 (2.96, 3.57)                              | 0.48 (0.39, 0.57)                   | 1.78 (1.23, 2.57)                              |                                    |
| Medium, decrease | 0.38 (0.36, 0.40)                   | 1.12 (0.99, 1.26)                              | 0.52 (0.42, 0.62)                   | 0.76 (0.46, 1.27)                              |                                    |
| Medium, increase | 0.39 (0.35, 0.44)                   | 1.21 (0.98, 1.49)                              | 0.48 (0.42, 0.53)                   | 0.91 (0.53, 1.55)                              |                                    |
| Medium, stable   | 0.35 (0.33, 0.37)                   | Ref                                            | 0.55 (0.45, 0.64)                   | Ref                                            | <0.001                             |
| <b>AHEI</b>      |                                     |                                                |                                     |                                                |                                    |
| High, decrease   | 0.49 (0.35, 0.63)                   | 0.88 (0.81, 0.96)                              | 0.75 (0.70, 0.79)                   | 0.87 (0.67, 1.13)                              |                                    |
| High, increase   | 0.48 (0.34, 0.62)                   | 1.13 (1.03, 1.23)                              | 0.74 (0.69, 0.79)                   | 0.85 (0.66, 1.09)                              |                                    |
| High, stable     | 0.47 (0.33, 0.61)                   | 1.04 (0.96, 1.12)                              | 0.78 (0.75, 0.82)                   | 1.06 (0.85, 1.33)                              |                                    |
| Low, decrease    | 0.49 (0.35, 0.63)                   | 0.72 (0.66, 0.78)                              | 0.69 (0.62, 0.74)                   | 0.65 (0.49, 0.86)                              |                                    |

|                          |                   |                   |                   |                   |        |
|--------------------------|-------------------|-------------------|-------------------|-------------------|--------|
| Low, increase            | 0.45 (0.32, 0.59) | 0.80 (0.73, 0.87) | 0.73 (0.67, 0.78) | 0.80 (0.60, 1.06) |        |
| Low, stable              | 0.43 (0.30, 0.57) | 0.84 (0.79, 0.90) | 0.74 (0.70, 0.78) | 0.84 (0.68, 1.04) |        |
| Medium, decrease         | 0.54 (0.40, 0.68) | 0.88 (0.82, 0.95) | 0.70 (0.66, 0.75) | 0.70 (0.56, 0.88) |        |
| Medium, increase         | 0.50 (0.37, 0.64) | 0.97 (0.91, 1.04) | 0.73 (0.69, 0.77) | 0.80 (0.64, 1.01) |        |
| Medium, stable           | 0.51 (0.37, 0.65) | Ref               | 0.77 (0.74, 0.80) | Ref               | <0.001 |
| <b>Physical activity</b> |                   |                   |                   |                   |        |
| High, decrease           | 0.45 (0.31, 0.58) | 0.74 (0.61, 0.90) | 0.74 (0.61, 0.84) | 1.17 (0.62, 2.18) |        |
| High, increase           | 0.43 (0.31, 0.57) | 1.08 (0.93, 1.25) | 0.72 (0.65, 0.79) | 1.06 (0.73, 1.54) |        |
| High, stable             | 0.38 (0.26, 0.51) | 0.92 (0.81, 1.06) | 0.77 (0.65, 0.86) | 1.38 (0.75, 2.56) |        |
| Low, decrease            | 0.49 (0.35, 0.63) | 0.66 (0.52, 0.82) | 0.56 (0.47, 0.64) | 0.51 (0.35, 0.73) |        |
| Low, increase            | 0.41 (0.29, 0.55) | 0.75 (0.70, 0.80) | 0.59 (0.50, 0.68) | 0.59 (0.40, 0.86) |        |
| Low, stable              | 0.37 (0.25, 0.51) | 0.75 (0.70, 0.81) | 0.61 (0.59, 0.64) | 0.63 (0.55, 0.73) |        |
| Medium, decrease         | 0.50 (0.36, 0.64) | 0.84 (0.71, 0.99) | 0.64 (0.57, 0.71) | 0.73 (0.53, 1.00) |        |
| Medium, increase         | 0.46 (0.33, 0.59) | 1.08 (1.00, 1.16) | 0.75 (0.70, 0.78) | 1.19 (0.94, 1.50) |        |
| Medium, stable           | 0.46 (0.33, 0.60) | Ref               | 0.71 (0.68, 0.75) | Ref               | <0.001 |
| <b>Alcohol intake</b>    |                   |                   |                   |                   |        |
| High, decrease           | 0.53 (0.38, 0.66) | 0.62 (0.52, 0.74) | 0.70 (0.61, 0.78) | 0.71 (0.46, 1.10) |        |
| High, increase           | 0.51 (0.37, 0.65) | 0.80 (0.70, 0.91) | 0.75 (0.66, 0.82) | 0.88 (0.56, 1.38) |        |
| High, stable             | 0.45 (0.31, 0.59) | 0.72 (0.64, 0.81) | 0.76 (0.70, 0.81) | 0.93 (0.68, 1.27) |        |
| Low, decrease            | 0.59 (0.44, 0.72) | 0.65 (0.52, 0.81) | 0.75 (0.50, 0.90) | 0.88 (0.30, 2.60) |        |
| Low, increase            | 0.53 (0.39, 0.67) | 1.18 (0.95, 1.45) | 0.75 (0.63, 0.85) | 0.92 (0.50, 1.67) |        |
| Low, stable              | 0.51 (0.37, 0.65) | 0.95 (0.89, 1.00) | 0.74 (0.71, 0.77) | 0.86 (0.72, 1.02) |        |
| Medium, decrease         | 0.56 (0.41, 0.70) | 0.77 (0.68, 0.87) | 0.71 (0.64, 0.77) | 0.74 (0.52, 1.04) |        |
| Medium, increase         | 0.48 (0.34, 0.62) | 1.02 (0.92, 1.14) | 0.73 (0.67, 0.79) | 0.81 (0.58, 1.13) |        |
| Medium, stable           | 0.47 (0.33, 0.62) | Ref               | 0.77 (0.73, 0.80) | Ref               | <0.001 |

\*Logistic model adjusted for baseline age (continuous), race (White, Black, Asian, and other), family histories of cancer (yes, no), myocardial infarction (yes, no), and type 2 diabetes (yes, no), multivitamin use (yes, no), menopausal status (yes, no, women only), postmenopausal hormone use (yes, no, women only), cohort, education (registered nurse, bachelor degree, master degree and higher, women only), social economic status (annual family income [quartiles] for women and work status [disabled, retired, part-time, full-time] for men), aspirin use (yes, no), use of antihypertensive medications (yes, no), use of cholesterol lowering medications (yes, no), and the other four risk factors at baseline as continuous variables.

#Predicted odds of longevity was obtained using ‘estimate’ statement under ‘proc logistic’ command in SAS, assuming mean values of continuous covariates and median values of categorical covariates.

&We included interaction terms of age (<65, ≥65 years) and joint patterns of lifestyle factors (9 categories) into the model (18 categories of interaction terms). P for interaction was obtained using likelihood ratio test comparing models with and without interaction terms.

Table S8. Percentage (%) of missing of risk factors at each assessment in the Nurses’ Health Study (NHS) and the Health Professionals Follow-up Study (HPFS).

|                   | Time at assessment of risk factors |    |    |    |    |    |    |    |    |    |    |    |    |    |    |    |    |
|-------------------|------------------------------------|----|----|----|----|----|----|----|----|----|----|----|----|----|----|----|----|
|                   | 84                                 | 86 | 88 | 90 | 92 | 94 | 96 | 98 | 00 | 02 | 04 | 06 | 08 | 10 | 12 | 14 | 16 |
| BMI               |                                    |    |    |    |    |    |    |    |    |    |    |    |    |    |    |    |    |
| NHS               | 6                                  | 10 | 14 | 3  | 6  | 1  | 2  | 2  | 3  | 7  | 6  | 8  | 8  | 9  | 11 | 12 | 14 |
| HPFS              |                                    | 0  | 0  | 0  | 0  | 0  | 0  | 0  | 0  | 0  | 0  | 0  | 0  | 0  | 0  | 0  | 0  |
| Smoking           |                                    |    |    |    |    |    |    |    |    |    |    |    |    |    |    |    |    |
| NHS               |                                    |    | 0  | 0  | 0  | 0  | 0  | 0  | 0  | 0  | 0  | 0  | 0  | 0  | 0  | 0  | 0  |
| HPFS              | 0                                  | 4  | 2  | 1  | 2  | 2  | 2  | 2  | 3  | 2  | 3  | 3  | 4  | 6  | 8  | 3  | 3  |
| Diet quality      |                                    |    |    |    |    |    |    |    |    |    |    |    |    |    |    |    |    |
| NHS               | 0                                  | 14 |    | 12 |    | 9  |    | 10 |    | 10 |    | 9  |    | 11 |    |    |    |
| HPFS              |                                    | 0  |    | 23 |    | 20 |    | 19 |    | 17 |    | 18 |    |    |    |    |    |
| Physical activity |                                    |    |    |    |    |    |    |    |    |    |    |    |    |    |    |    |    |
| NHS               |                                    | 9  | 4  |    | 2  | 1  | 1  | 1  | 0  |    | 0  |    | 0  |    | 10 | 9  |    |
| HPFS              |                                    | 1  |    | 0  |    | 0  |    | 0  |    | 0  |    | 0  | 0  |    |    |    |    |
| Alcohol intake    |                                    |    |    |    |    |    |    |    |    |    |    |    |    |    |    |    |    |
| NHS               | 0                                  | 14 |    | 12 |    | 9  |    | 10 |    | 10 |    | 9  |    | 11 |    |    |    |
| HPFS              |                                    | 0  |    | 23 |    | 20 |    | 19 |    | 17 |    | 18 |    | 24 |    |    |    |

Table S9. Total number of assessments of risk factors during follow-up period in the Nurses' Health Study (NHS) (n=51442).

| BMI                   |                                                  |                                                                          | Smoking               |                                                  |                                                                          | Physical activity     |                                                  |                                                                          | Alcohol intake        |                                                  |                                                                          | Diet quality          |                                                  |                                                                          |
|-----------------------|--------------------------------------------------|--------------------------------------------------------------------------|-----------------------|--------------------------------------------------|--------------------------------------------------------------------------|-----------------------|--------------------------------------------------|--------------------------------------------------------------------------|-----------------------|--------------------------------------------------|--------------------------------------------------------------------------|-----------------------|--------------------------------------------------|--------------------------------------------------------------------------|
| Number of assessments | Percent age of participants in original data (%) | Percentage of participants after censoring participants <sup>#</sup> (%) | Number of assessments | Percent age of participants in original data (%) | Percentage of participants after censoring participants <sup>#</sup> (%) | Number of assessments | Percent age of participants in original data (%) | Percentage of participants after censoring participants <sup>#</sup> (%) | Number of assessments | Percent age of participants in original data (%) | Percentage of participants after censoring participants <sup>#</sup> (%) | Number of assessments | Percent age of participants in original data (%) | Percentage of participants after censoring participants <sup>#</sup> (%) |
| 0                     | 0                                                | 0                                                                        | 0                     | 0                                                | 0                                                                        | 0                     | 2                                                | 5                                                                        | 1                     | 3                                                | 6                                                                        | 1                     | 3                                                | 6                                                                        |
| 1                     | 1                                                | 4                                                                        | 1                     | 1                                                | 3                                                                        | 1                     | 1                                                | 4                                                                        | 2                     | 5                                                | 9                                                                        | 2                     | 5                                                | 9                                                                        |
| 2                     | 1                                                | 4                                                                        | 2                     | 1                                                | 3                                                                        | 2                     | 3                                                | 7                                                                        | 3                     | 6                                                | 9                                                                        | 3                     | 6                                                | 9                                                                        |
| 3                     | 2                                                | 4                                                                        | 3                     | 1                                                | 4                                                                        | 3                     | 2                                                | 4                                                                        | 4                     | 7                                                | 11                                                                       | 4                     | 7                                                | 11                                                                       |
| 4                     | 2                                                | 4                                                                        | 4                     | 2                                                | 4                                                                        | 4                     | 2                                                | 5                                                                        | 5                     | 10                                               | 12                                                                       | 5                     | 10                                               | 12                                                                       |
| 5                     | 2                                                | 4                                                                        | 5                     | 2                                                | 4                                                                        | 5                     | 3                                                | 6                                                                        | 6                     | 13                                               | 13                                                                       | 6                     | 13                                               | 13                                                                       |
| 6                     | 3                                                | 5                                                                        | 6                     | 2                                                | 5                                                                        | 6                     | 5                                                | 7                                                                        | 7                     | 19                                               | 17                                                                       | 7                     | 19                                               | 17                                                                       |
| 7                     | 3                                                | 5                                                                        | 7                     | 3                                                | 5                                                                        | 7                     | 8                                                | 11                                                                       | 8                     | 38                                               | 22                                                                       | 8                     | 38                                               | 22                                                                       |
| 8                     | 4                                                | 6                                                                        | 8                     | 3                                                | 6                                                                        | 8                     | 12                                               | 14                                                                       |                       |                                                  |                                                                          |                       |                                                  |                                                                          |
| 9                     | 5                                                | 6                                                                        | 9                     | 4                                                | 6                                                                        | 9                     | 16                                               | 16                                                                       |                       |                                                  |                                                                          |                       |                                                  |                                                                          |
| 10                    | 6                                                | 7                                                                        | 10                    | 4                                                | 6                                                                        | 10                    | 11                                               | 8                                                                        |                       |                                                  |                                                                          |                       |                                                  |                                                                          |
| 11                    | 7                                                | 8                                                                        | 11                    | 6                                                | 6                                                                        | 11                    | 34                                               | 14                                                                       |                       |                                                  |                                                                          |                       |                                                  |                                                                          |
| 12                    | 8                                                | 9                                                                        | 12                    | 6                                                | 8                                                                        |                       |                                                  |                                                                          |                       |                                                  |                                                                          |                       |                                                  |                                                                          |
| 13                    | 9                                                | 9                                                                        | 13                    | 7                                                | 9                                                                        |                       |                                                  |                                                                          |                       |                                                  |                                                                          |                       |                                                  |                                                                          |
| 14                    | 10                                               | 8                                                                        | 14                    | 8                                                | 8                                                                        |                       |                                                  |                                                                          |                       |                                                  |                                                                          |                       |                                                  |                                                                          |
| 15                    | 12                                               | 7                                                                        | 15                    | 9                                                | 7                                                                        |                       |                                                  |                                                                          |                       |                                                  |                                                                          |                       |                                                  |                                                                          |
| 16                    | 13                                               | 6                                                                        | 16                    | 10                                               | 6                                                                        |                       |                                                  |                                                                          |                       |                                                  |                                                                          |                       |                                                  |                                                                          |
| 17                    | 13                                               | 5                                                                        | 17                    | 30                                               | 10                                                                       |                       |                                                  |                                                                          |                       |                                                  |                                                                          |                       |                                                  |                                                                          |

<sup>#</sup>We censored risk factors reported after diagnosis of CVD, type 2 diabetes, or cancer, and risk factors reported after age 85.

Table S10. Total number of assessments of risk factors during follow-up period in the Health Professionals Follow-up Study (HPFS) (n=33904).

| BMI                   |                                                  |                                                              | Smoking               |                                                  |                                                              | Physical activity     |                                                  |                                                              | Alcohol intake        |                                                  |                                                              | Diet quality          |                                                  |                                                              |
|-----------------------|--------------------------------------------------|--------------------------------------------------------------|-----------------------|--------------------------------------------------|--------------------------------------------------------------|-----------------------|--------------------------------------------------|--------------------------------------------------------------|-----------------------|--------------------------------------------------|--------------------------------------------------------------|-----------------------|--------------------------------------------------|--------------------------------------------------------------|
| Number of assessments | Percent age of participants in original data (%) | Percentage of participants after censoring participants# (%) | Number of assessments | Percent age of participants in original data (%) | Percentage of participants after censoring participants# (%) | Number of assessments | Percent age of participants in original data (%) | Percentage of participants after censoring participants# (%) | Number of assessments | Percent age of participants in original data (%) | Percentage of participants after censoring participants# (%) | Number of assessments | Percent age of participants in original data (%) | Percentage of participants after censoring participants# (%) |
| 1                     | 2                                                | 7                                                            | 1                     | 2                                                | 7                                                            | 1                     | 6                                                | 15                                                           | 1                     | 12                                               | 23                                                           | 0                     | 0                                                | 8                                                            |
| 2                     | 3                                                | 8                                                            | 2                     | 3                                                | 8                                                            | 2                     | 8                                                | 17                                                           | 2                     | 11                                               | 19                                                           | 1                     | 12                                               | 13                                                           |
| 3                     | 4                                                | 9                                                            | 3                     | 4                                                | 9                                                            | 3                     | 9                                                | 16                                                           | 3                     | 11                                               | 16                                                           | 2                     | 11                                               | 12                                                           |
| 4                     | 4                                                | 8                                                            | 4                     | 5                                                | 8                                                            | 4                     | 11                                               | 15                                                           | 4                     | 12                                               | 14                                                           | 3                     | 12                                               | 13                                                           |
| 5                     | 4                                                | 8                                                            | 5                     | 4                                                | 8                                                            | 5                     | 12                                               | 12                                                           | 5                     | 14                                               | 11                                                           | 4                     | 14                                               | 16                                                           |
| 6                     | 5                                                | 8                                                            | 6                     | 5                                                | 8                                                            | 6                     | 10                                               | 7                                                            | 6                     | 15                                               | 9                                                            | 5                     | 18                                               | 24                                                           |
| 7                     | 5                                                | 8                                                            | 7                     | 5                                                | 8                                                            | 7                     | 45                                               | 17                                                           | 7                     | 24                                               | 9                                                            | 6                     | 33                                               | 15                                                           |
| 8                     | 6                                                | 7                                                            | 8                     | 6                                                | 7                                                            |                       |                                                  |                                                              |                       |                                                  |                                                              |                       |                                                  |                                                              |
| 9                     | 6                                                | 7                                                            | 9                     | 6                                                | 6                                                            |                       |                                                  |                                                              |                       |                                                  |                                                              |                       |                                                  |                                                              |
| 10                    | 6                                                | 6                                                            | 10                    | 6                                                | 6                                                            |                       |                                                  |                                                              |                       |                                                  |                                                              |                       |                                                  |                                                              |
| 11                    | 6                                                | 5                                                            | 11                    | 7                                                | 5                                                            |                       |                                                  |                                                              |                       |                                                  |                                                              |                       |                                                  |                                                              |
| 12                    | 7                                                | 4                                                            | 12                    | 7                                                | 4                                                            |                       |                                                  |                                                              |                       |                                                  |                                                              |                       |                                                  |                                                              |
| 13                    | 7                                                | 4                                                            | 13                    | 8                                                | 4                                                            |                       |                                                  |                                                              |                       |                                                  |                                                              |                       |                                                  |                                                              |
| 14                    | 8                                                | 3                                                            | 14                    | 8                                                | 3                                                            |                       |                                                  |                                                              |                       |                                                  |                                                              |                       |                                                  |                                                              |
| 15                    | 7                                                | 3                                                            | 15                    | 9                                                | 3                                                            |                       |                                                  |                                                              |                       |                                                  |                                                              |                       |                                                  |                                                              |
| 16                    | 19                                               | 5                                                            | 16                    | 14                                               | 4                                                            |                       |                                                  |                                                              |                       |                                                  |                                                              |                       |                                                  |                                                              |

#We censored risk factors reported after diagnosis of CVD, type 2 diabetes, or cancer, and risk factors reported after age 85.



Figure S13. Plots of joint patterns of risk factors after missing data imputation by pooling the Nurses' Health Study and the Health Professionals Follow-up Study.

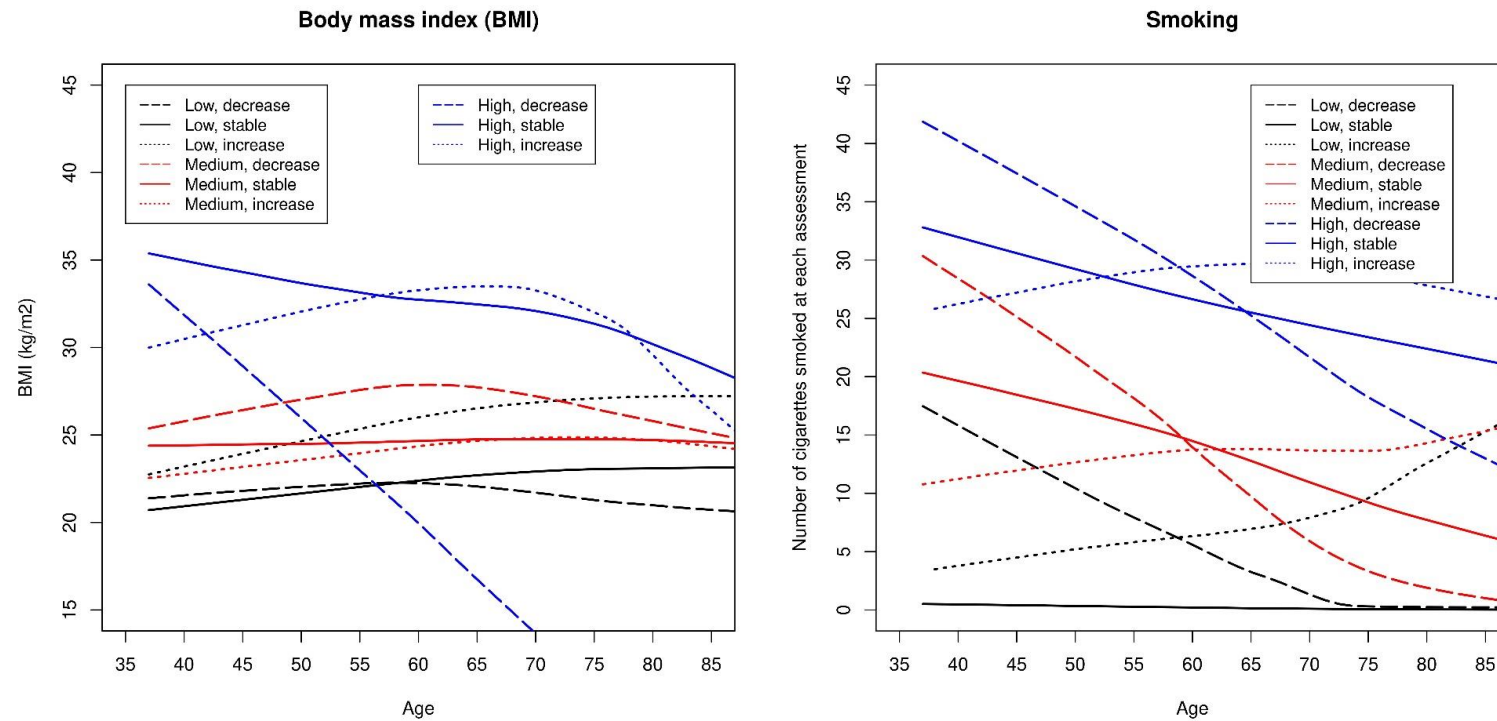

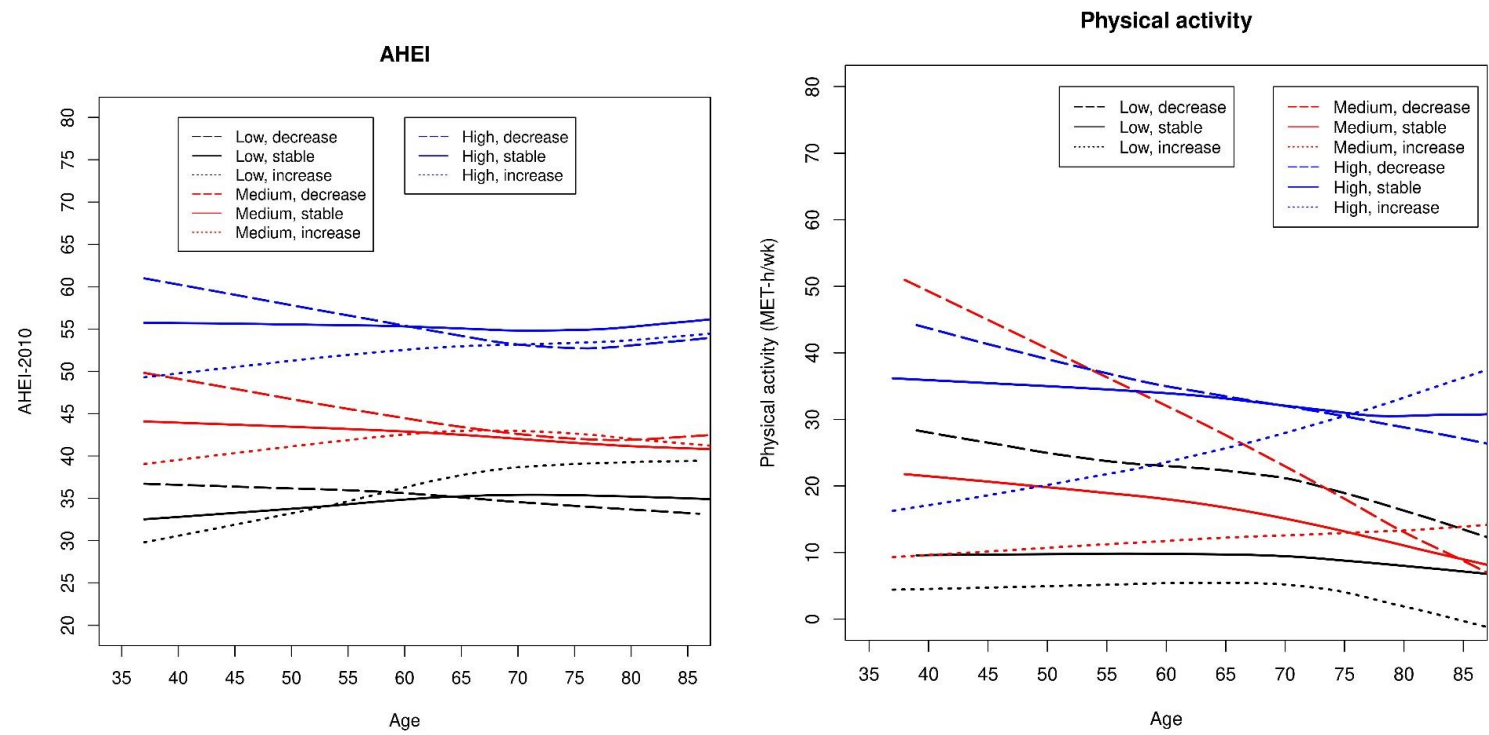

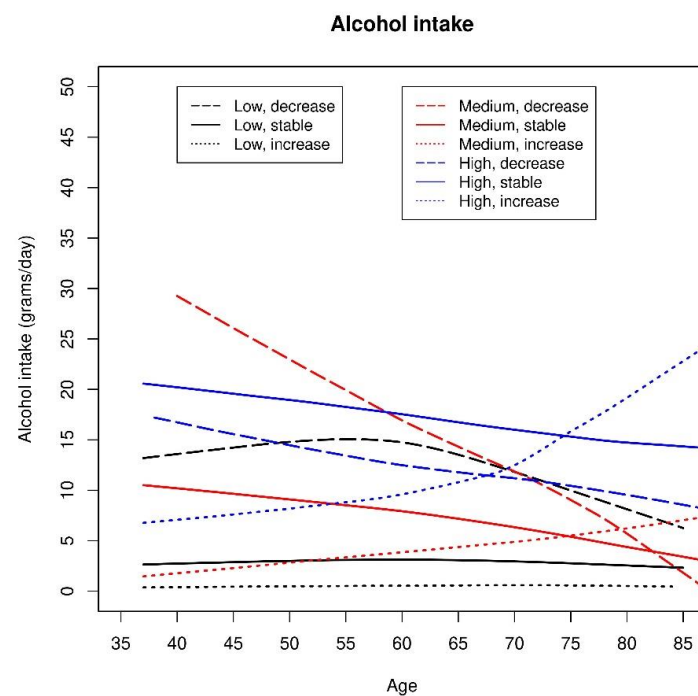

We identified patterns of risk factor and patterns of change in risk factor using smoothing mixture models, classified participants according to joint group membership, and plotted trajectories of risk factor within each category.

Table S11. Associations of patterns of risk factors and patterns of change in risk factors after missing data imputation with odds ratios (OR) of achieving longevity by pooling the Nurses' Health Study and the Health Professionals Follow-up Study.

| Risk factors               | Medium | Low               | High              | Change in risk factors     | No change | Increase          | Decrease          |
|----------------------------|--------|-------------------|-------------------|----------------------------|-----------|-------------------|-------------------|
| <b>BMI</b>                 |        |                   |                   | <b>BMI</b>                 |           |                   |                   |
| Model 1                    | 1.00   | 0.82 (0.80, 0.84) | 0.53 (0.51, 0.55) | Model 3                    | 1.00      | 0.61 (0.59, 0.63) | 0.55 (0.53, 0.57) |
| Model 2                    | 1.00   | 0.86 (0.83, 0.89) | 0.58 (0.56, 0.61) | Model 4                    | 1.00      | 0.83 (0.80, 0.86) | 0.58 (0.55, 0.60) |
| <b>Smoking</b>             |        |                   |                   | <b>Smoking</b>             |           |                   |                   |
| Model 1                    | 1.00   | 3.00 (2.87, 3.15) | 0.49 (0.44, 0.53) | Model 3                    | 1.00      | 0.40 (0.35, 0.46) | 1.14 (1.04, 1.25) |
| Model 2                    | 1.00   | 2.89 (2.74, 3.05) | 0.50 (0.45, 0.55) | Model 4                    | 1.00      | 0.54 (0.46, 0.62) | 1.11 (1.00, 1.23) |
| <b>Diet quality (AHEI)</b> |        |                   |                   | <b>Diet quality (AHEI)</b> |           |                   |                   |
| Model 1                    | 1.00   | 0.74 (0.71, 0.76) | 1.21 (1.16, 1.25) | Model 3                    | 1.00      | 1.19 (1.14, 1.24) | 0.87 (0.83, 0.90) |
| Model 2                    | 1.00   | 0.90 (0.86, 0.93) | 1.05 (1.01, 1.10) | Model 4                    | 1.00      | 1.10 (1.05, 1.15) | 0.91 (0.87, 0.95) |
| <b>Physical activity</b>   |        |                   |                   | <b>Physical activity</b>   |           |                   |                   |
| Model 1                    | 1.00   | 0.60 (0.58, 0.62) | 1.14 (1.10, 1.19) | Model 3                    | 1.00      | 0.97 (0.93, 1.01) | 0.75 (0.69, 0.82) |
| Model 2                    | 1.00   | 0.66 (0.63, 0.69) | 1.22 (1.17, 1.28) | Model 4                    | 1.00      | 1.01 (0.97, 1.06) | 0.83 (0.76, 0.91) |
| <b>Alcohol intake</b>      |        |                   |                   | <b>Alcohol intake</b>      |           |                   |                   |
| Model 1                    | 1.00   | 0.69 (0.67, 0.71) | 0.95 (0.91, 0.98) | Model 3                    | 1.00      | 0.95 (0.90, 0.99) | 0.59 (0.55, 0.64) |
| Model 2                    | 1.00   | 0.89 (0.85, 0.93) | 0.95 (0.91, 1.00) | Model 4                    | 1.00      | 0.94 (0.89, 1.00) | 0.74 (0.68, 0.81) |

Model 1 is univariate analysis.

Model 2 adjusted for baseline age (continuous), race (White, Black, Asian, and other), family histories of cancer (yes, no), myocardial infarction (yes, no), and type 2 diabetes (yes, no), multivitamin use (yes, no), menopausal status (yes, no, women only), postmenopausal hormone use (yes, no, women only), cohort, education (registered nurse, bachelor degree, master degree and higher, women only), social economic status (annual family income [quartiles] for women and work status [disabled, retired, part-time, full-time] for men), and the other four risk factors at baseline as continuous variables.

Model 3 is model 1 additionally adjusting for the risk factor at baseline (continuous) and the risk factor patterns (categorical).

Model 4 is model 2 additionally adjusting for the risk factor at baseline (continuous) and the risk factor patterns (categorical).  
Figure S14. Kaplan–Meier plot of survival during follow up in the Nurses’ Health Study and the Health Professionals Follow-up Study.

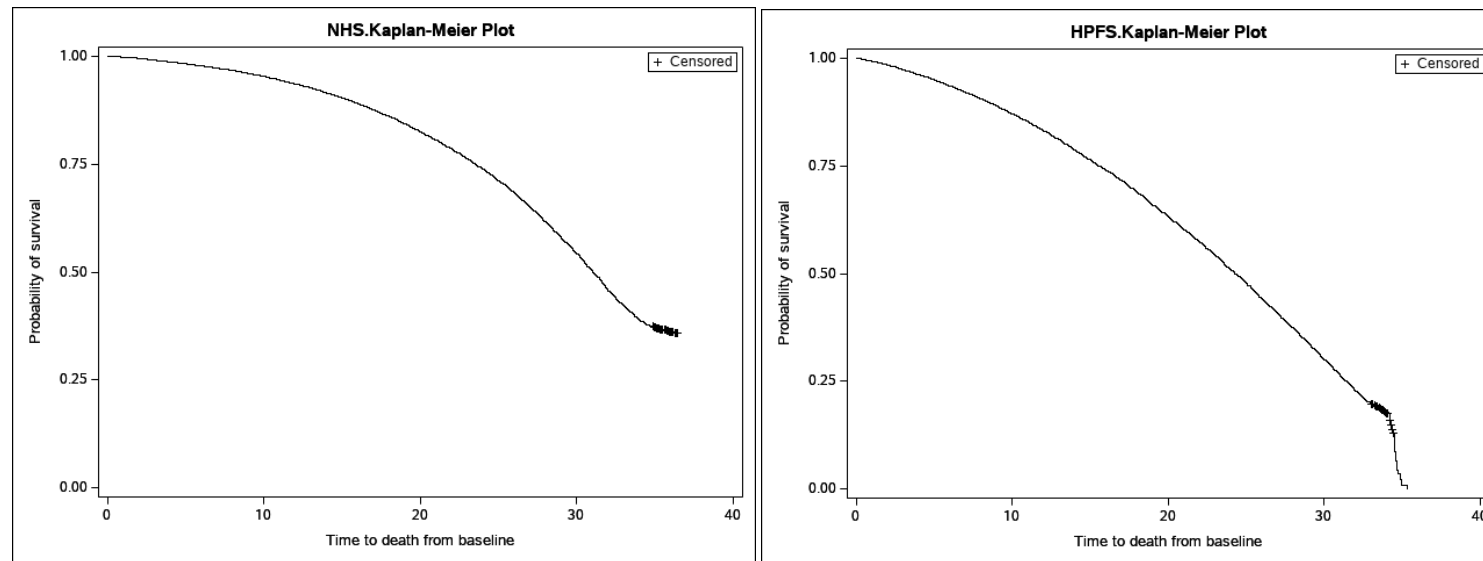

Figure S15. Plots of joint patterns of diet quality, physical activity, alcohol intake using unstandardized data by pooling the Nurses' Health Study and the Health Professionals Follow-up Study.

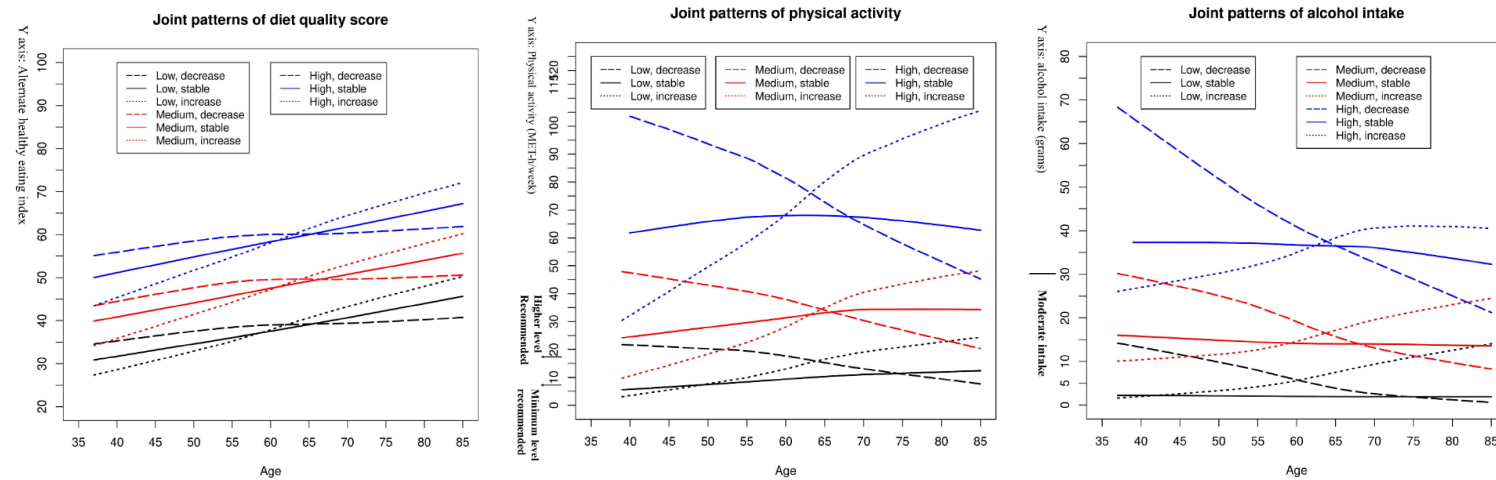

We identified patterns of risk factor and patterns of change in risk factor using smoothing mixture models, classified participants according to joint group membership, and plotted trajectories of risk factor within each category.

Table S12. Associations of patterns of risk factor and patterns of change in risk factor using unstandardized data with odds ratios (OR) of achieving longevity by pooling the Nurses' Health Study and the Health Professionals Follow-up Study.

| Patterns of risk factor | Medium      | Low               | High              | Patterns of change in risk factor | No change   | Increase          | Decrease          |
|-------------------------|-------------|-------------------|-------------------|-----------------------------------|-------------|-------------------|-------------------|
| Diet quality (AHEI)     |             |                   |                   | Diet quality (AHEI)               |             |                   |                   |
| Cases/Participants      | 18346/30941 | 11619/21937       | 10588/17285       | Cases/Participants                | 19432/32253 | 9678/17909        | 11443/19908       |
| Model 1                 | 1.00        | 0.77 (0.75, 0.80) | 1.09 (1.04, 1.13) | Model 3                           | 1.00        | 0.85 (0.82, 0.89) | 0.78 (0.75, 0.81) |
| Model 2                 | 1.00        | 0.76 (0.73, 0.79) | 1.11 (1.06, 1.16) | Model 4                           | 1.00        | 0.99 (0.94, 1.03) | 0.81 (0.77, 0.85) |
| Physical activity       |             |                   |                   | Physical activity                 |             |                   |                   |
| Cases/Participants      | 12878/20467 | 25323/45630       | 2352/4065         | Cases/Participants                | 28694/49364 | 7120/11862        | 2592/5084         |
| Model 1                 | 1.00        | 0.73 (0.71, 0.76) | 0.81 (0.76, 0.87) | Model 3                           | 1.00        | 0.96 (0.91, 1.01) | 0.55 (0.51, 0.59) |
| Model 2                 | 1.00        | 0.72 (0.70, 0.75) | 0.86 (0.80, 0.93) | Model 4                           | 1.00        | 1.06 (1.00, 1.12) | 0.68 (0.63, 0.73) |
| Alcohol intake          |             |                   |                   | Alcohol intake                    |             |                   |                   |
| Cases/Participants      | 9896/16869  | 29757/51438       | 2736/5614         | Cases/Participants                | 32657/52517 | 3609/6342         | 1929/3928         |
| Model 1                 | 1.00        | 0.97 (0.93, 1.00) | 0.67 (0.63, 0.71) | Model 3                           | 1.00        | 0.75 (0.71, 0.80) | 0.62 (0.57, 0.68) |
| Model 2                 | 1.00        | 0.86 (0.83, 0.90) | 0.77 (0.72, 0.83) | Model 4                           | 1.00        | 1.08 (1.01, 1.16) | 0.74 (0.67, 0.82) |

Model 1 is univariate analysis.

Model 2 adjusted for baseline age (continuous), race (White, Black, Asian, and other), family histories of cancer (yes, no), myocardial infarction (yes, no), and type 2 diabetes (yes, no), multivitamin use (yes, no), menopausal status (yes, no, women only), postmenopausal hormone use (yes, no, women only), cohort, education (registered nurse, bachelor degree, master degree and higher, women only), social economic status (annual family income [quartiles] for women and work status [disabled, retired, part-time, full-time] for men), and the other four risk factors at baseline as continuous variables.

Model 3 is model 1 additionally adjusting for the risk factor at baseline (continuous) and the risk factor patterns (categorical).

Model 4 is model 2 additionally adjusting for the risk factor at baseline (continuous) and the risk factor patterns (categorical).

Table S13. Comparison between participants who were excluded due to unknown longevity status (i.e. who were alive and did not reach 85) and the main study population.

|                                                | NHS (1984)                   |                                                         | HPFS (1986)                  |                                                         |
|------------------------------------------------|------------------------------|---------------------------------------------------------|------------------------------|---------------------------------------------------------|
|                                                | Main population<br>(n=51442) | Participants with unknown<br>longevity status (n=26210) | Main population<br>(n=33904) | Participants with unknown<br>longevity status (n=15330) |
| Age                                            | 54.21 (5.41)                 | 42.86 (3.14)                                            | 59.52 (8.04)                 | 44.36 (3.19)                                            |
| BMI (kg/m <sup>2</sup> )                       | 25.23 (4.72)                 | 24.37 (4.46)                                            | 25.01 (5.27)                 | 24.73 (4.52)                                            |
| Alcohol intake (g)                             | 7.37 (11.92)                 | 6.16 (9.91)                                             | 12.04 (16.33)                | 9.86 (13.30)                                            |
| Physical activity (MET-<br>h/week)             | 13.99 (20.42)                | 14.51 (22.09)                                           | 19.53 (26.59)                | 23.65 (32.28)                                           |
| AHEI                                           | 44.22 (10.32)                | 41.41 (9.83)                                            | 47.77 (10.92)                | 45.43 (10.62)                                           |
| Current smoker, %                              | 26                           | 21                                                      | 11                           | 8                                                       |
| Caucasian, %                                   | 98                           | 98                                                      | 91                           | 91                                                      |
| Menopausal status, %                           | 69                           | 8                                                       | NA                           | NA                                                      |
| Postmenopausal hormone<br>use, % <sup>§</sup>  | 18                           | 6                                                       | NA                           | NA                                                      |
| Family history of cancer, %                    | 42                           | 36                                                      | 9                            | 7                                                       |
| Family history of<br>cardiovascular disease, % | 36                           | 31                                                      | 35                           | 29                                                      |
| Family history of diabetes, %                  | 23                           | 21                                                      | 15                           | 11                                                      |
| Multivitamin use, %                            | 38                           | 36                                                      | 33                           | 29                                                      |



Table S14. Associations of patterns of risk factor and patterns of change in risk factor with odds ratios (OR) of mortality further including participants that were excluded due to unknown longevity status by pooling the Nurses' Health Study and the Health Professionals Follow-up Study.

| Risk factors             | Medium      | Low               | High              | Change in risk factors   | No change    | Increase          | Decrease          |
|--------------------------|-------------|-------------------|-------------------|--------------------------|--------------|-------------------|-------------------|
| <b>BMI</b>               |             |                   |                   | <b>BMI</b>               |              |                   |                   |
| Cases/Participants       | 22904/49215 | 27025/57979       | 7162/15198        | Cases/Participants       | 20558/47718  | 12797/33165       | 18365/33377       |
| Model 1                  | 1.00        | 1.03 (1.00, 1.05) | 1.02 (0.98, 1.06) | Model 3                  | 1.00         | 0.58 (0.56, 0.60) | 1.96 (1.90, 2.02) |
| Model 2                  | 1.00        | 1.00 (0.96, 1.03) | 1.75 (1.67, 1.84) | Model 4                  | 1.00         | 0.99 (0.95, 1.04) | 1.46 (1.40, 1.51) |
| <b>Smoking</b>           |             |                   |                   | <b>Smoking</b>           |              |                   |                   |
| Cases/Participants       | 6810/11682  | 44749/103633      | 5338/6891         | Cases/Participants       | 45508/103297 | 1625/2497         | 4975/9767         |
| Model 1                  | 1.00        | 0.48 (0.46, 0.50) | 2.57 (2.40, 2.75) | Model 3                  | 1.00         | 0.85 (0.77, 0.93) | 0.72 (0.66, 0.77) |
| Model 2                  | 1.00        | 0.36 (0.34, 0.38) | 1.94 (1.78, 2.12) | Model 4                  | 1.00         | 1.72 (1.52, 1.95) | 0.70 (0.64, 0.78) |
| <b>AHEI</b>              |             |                   |                   | <b>AHEI</b>              |              |                   |                   |
| Cases/Participants       | 24478/53366 | 17631/37512       | 13415/28677       | Cases/Participants       | 23075/50907  | 9992/27788        | 13114/28040       |
| Model 1                  | 1.00        | 1.05 (1.02, 1.08) | 1.02 (0.99, 1.05) | Model 3                  | 1.00         | 0.81 (0.78, 0.84) | 0.88 (0.85, 0.92) |
| Model 2                  | 1.00        | 1.16 (1.12, 1.20) | 0.94 (0.90, 0.98) | Model 4                  | 1.00         | 0.95 (0.91, 1.00) | 1.18 (1.13, 1.24) |
| <b>Physical activity</b> |             |                   |                   | <b>Physical activity</b> |              |                   |                   |
| Cases/Participants       | 14685/36412 | 41241/80802       | 2611/6630         | Cases/Participants       | 41088/82399  | 7812/22674        | 2244/5689         |
| Model 1                  | 1.00        | 1.57 (1.53, 1.61) | 0.95 (0.90, 1.00) | Model 3                  | 1.00         | 0.59 (0.57, 0.62) | 0.78 (0.73, 0.84) |
| Model 2                  | 1.00        | 1.28 (1.24, 1.32) | 1.11 (1.04, 1.19) | Model 4                  | 1.00         | 0.83 (0.80, 0.87) | 1.46 (1.34, 1.59) |
| <b>Alcohol intake</b>    |             |                   |                   | <b>Alcohol intake</b>    |              |                   |                   |
| Cases/Participants       | 12489/27992 | 38183/82791       | 4903/8992         | Cases/Participants       | 39277/89581  | 3932/11527        | 3057/5985         |
| Model 1                  | 1.00        | 1.13 (1.10, 1.16) | 1.47 (1.40, 1.54) | Model 3                  | 1.00         | 0.64 (0.61, 0.68) | 0.85 (0.79, 0.92) |
| Model 2                  | 1.00        | 1.06 (1.02, 1.10) | 1.26 (1.18, 1.34) | Model 4                  | 1.00         | 1.08 (1.01, 1.16) | 1.18 (1.07, 1.30) |

Model 1 is univariate analysis.

Model 2 adjusted for baseline age (continuous), race (White, Black, Asian, and other), family histories of cancer (yes, no), myocardial infarction (yes, no), and type 2 diabetes (yes, no), multivitamin use (yes, no), menopausal status (yes, no, women only), postmenopausal hormone use (yes, no, women only), cohort, education (registered nurse, bachelor degree, master degree and higher, women only), social economic status (annual family income [quartiles] for women and work status [disabled, retired, part-time, full-time] for men), and the other four risk factors at baseline as continuous variables.

Model 3 is model 1 additionally adjusting for the risk factor at baseline (continuous) and the risk factor patterns (categorical).

Model 4 is model 2 additionally adjusting for the risk factor at baseline (continuous) and the risk factor patterns (categorical).

Table S15. Associations of patterns of risk factor and patterns of change in risk factor with odds ratios (OR) of achieving longevity excluding participants who were below 51 years in the Nurses' Health Study and 49 years in the Health Professionals Follow-up Study.

| Risk factors             | Medium      | Low               | High              | Change in risk factors   | No change   | Increase          | Decrease          |
|--------------------------|-------------|-------------------|-------------------|--------------------------|-------------|-------------------|-------------------|
| <b>BMI</b>               |             |                   |                   | <b>BMI</b>               |             |                   |                   |
| Cases/Participants       | 15705/25184 | 18926/30518       | 2798/5445         | Cases/Participants       | 21392/31101 | 2649/4466         | 10253/18634       |
| Model 1                  | 1.00        | 0.98 (0.94, 1.01) | 0.63 (0.59, 0.67) | Model 3                  | 1.00        | 0.72 (0.67, 0.77) | 0.56 (0.54, 0.58) |
| Model 2                  | 1.00        | 0.98 (0.94, 1.02) | 0.63 (0.59, 0.67) | Model 4                  | 1.00        | 0.86 (0.80, 0.93) | 0.58 (0.56, 0.61) |
| <b>Smoking</b>           |             |                   |                   | <b>Smoking</b>           |             |                   |                   |
| Cases/Participants       | 2444/5914   | 34509/53258       | 920/3234          | Cases/Participants       | 33808/52513 | 459/1180          | 1646/3964         |
| Model 1                  | 1.00        | 2.83 (2.68, 2.99) | 0.55 (0.50, 0.60) | Model 3                  | 1.00        | 0.62 (0.54, 0.72) | 1.49 (1.33, 1.66) |
| Model 2                  | 1.00        | 2.72 (2.56, 2.90) | 0.56 (0.51, 0.62) | Model 4                  | 1.00        | 0.65 (0.56, 0.75) | 1.44 (1.27, 1.63) |
| <b>AHEI</b>              |             |                   |                   | <b>AHEI</b>              |             |                   |                   |
| Cases/Participants       | 17186/27420 | 10249/18220       | 10222/15511       | Cases/Participants       | 17103/25685 | 8804/13309        | 8435/13404        |
| Model 1                  | 1.00        | 0.76 (0.74, 0.79) | 1.16 (1.11, 1.21) | Model 3                  | 1.00        | 1.05 (1.00, 1.11) | 0.76 (0.72, 0.80) |
| Model 2                  | 1.00        | 0.85 (0.82, 0.89) | 1.04 (0.99, 1.08) | Model 4                  | 1.00        | 1.02 (0.96, 1.07) | 0.83 (0.79, 0.88) |
| <b>Physical activity</b> |             |                   |                   | <b>Physical activity</b> |             |                   |                   |
| Cases/Participants       | 12260/18333 | 23968/42431       | 2158/3356         | Cases/Participants       | 15724/25967 | 18036/28641       | 1188/2029         |
| Model 1                  | 1.00        | 0.64 (0.62, 0.67) | 0.89 (0.83, 0.97) | Model 3                  | 1.00        | 1.04 (0.99, 1.10) | 0.65 (0.58, 0.73) |
| Model 2                  | 1.00        | 0.71 (0.69, 0.74) | 0.88 (0.81, 0.96) | Model 4                  | 1.00        | 1.07 (1.01, 1.13) | 0.72 (0.64, 0.81) |
| <b>Alcohol intake</b>    |             |                   |                   | <b>Alcohol intake</b>    |             |                   |                   |
| Cases/Participants       | 8913/14124  | 26300/42269       | 2494/4816         | Cases/Participants       | 29828/44981 | 2978/4621         | 1622/2908         |
| Model 1                  | 1.00        | 0.94 (0.91, 0.98) | 0.63 (0.59, 0.67) | Model 3                  | 1.00        | 0.93 (0.86, 1.00) | 0.77 (0.69, 0.85) |
| Model 2                  | 1.00        | 0.92 (0.88, 0.96) | 0.74 (0.69, 0.80) | Model 4                  | 1.00        | 1.00 (0.92, 1.09) | 0.83 (0.75, 0.93) |

Model 1 is univariate analysis.

Model 2 adjusted for baseline age (continuous), race (White, Black, Asian, and other), family histories of cancer (yes, no), myocardial infarction (yes, no), and type 2 diabetes (yes, no), multivitamin use (yes, no), menopausal status (yes, no, women only), postmenopausal hormone use (yes, no, women only), cohort, education (registered nurse, bachelor degree, master degree and higher, women only), social economic status (annual family income [quartiles] for women and work status [disabled, retired, part-time, full-time] for men), and the other four risk factors at baseline as continuous variables.

Model 3 is model 1 additionally adjusting for the risk factor at baseline (continuous) and the risk factor patterns (categorical).

Model 4 is model 2 additionally adjusting for the risk factor at baseline (continuous) and the risk factor patterns (categorical).

### Reference

1. Rimm EB, Stampfer MJ, Colditz GA, Chute CG, Litin LB, Willett WC. Validity of self-reported waist and hip circumferences in men and women. *Epidemiology* 1990;1:466-73.
2. Feskanich D, Rimm EB, Giovannucci EL, et al. Reproducibility and validity of food intake measurements from a semiquantitative food frequency questionnaire. *Journal of the American Dietetic Association* 1993;93:790-6.
3. Rimm EB, Giovannucci EL, Stampfer MJ, Colditz GA, Litin LB, Willett WC. Reproducibility and validity of an expanded self-administered semiquantitative food frequency questionnaire among male health professionals. *American journal of epidemiology* 1992;135:1114-26; discussion 27-36.
4. Salvini S, Hunter DJ, Sampson L, et al. Food-based validation of a dietary questionnaire: the effects of week-to-week variation in food consumption. *International journal of epidemiology* 1989;18:858-67.
5. Willett WC, Sampson L, Stampfer MJ, et al. Reproducibility and validity of a semiquantitative food frequency questionnaire. *American journal of epidemiology* 1985;122:51-65.
6. Chiuve SE, Fung TT, Rimm EB, et al. Alternative dietary indices both strongly predict risk of chronic disease. *The Journal of nutrition* 2012;142:1009-18.
7. Wolf AM, Hunter DJ, Colditz GA, et al. Reproducibility and validity of a self-administered physical activity questionnaire. *International journal of epidemiology* 1994;23:991-9.
8. Ainsworth BE, Haskell WL, Leon AS, et al. Compendium of physical activities: classification of energy costs of human physical activities. *Medicine and science in sports and exercise* 1993;25:71-80.
9. Ding M, Chavarro JE, Fitzmaurice GM. Development of a mixture model allowing for smoothing functions of longitudinal trajectories. *Stat Methods Med Res* 2020;962280220966019.
10. Nagin DS, Tremblay RE. Analyzing developmental trajectories of distinct but related behaviors: a group-based method. *Psychol Methods* 2001;6:18-34.
11. Berlin KS, Parra GR, Williams NA. An introduction to latent variable mixture modeling (part 2): longitudinal latent class growth analysis and growth mixture models. *J Pediatr Psychol* 2014;39:188-203.
12. Jones BL, Nagin DS, Roeder K. A SAS Procedure Based on Mixture Models for Estimating Developmental Trajectories. *Sociol Methods Res* 2001;29:374-93.
